# Supplementary material
Source: PubMed Central journal article supplement (PMC9879943)
Supplement: 42003_2023_4485_MOESM1_ESM.pdf [file 42003_2023_4485_MOESM1_ESM.pdf]

Supplementary information for

**The HDAC inhibitor zabadinostat is a systemic regulator of adaptive immunity**

Geng Liu<sup>~1</sup>, Wojciech Barczak<sup>~1</sup>, Lian Ni Lee<sup>2</sup>, Amit Shrestha<sup>1</sup>, Nicholas M Provine<sup>3</sup>  
Gulsah Albayrak<sup>1</sup>, Hong Zhu<sup>1,4</sup>, Claire Hutchings<sup>2</sup>, Paul Klenerman<sup>2,3</sup> and Nicholas B  
La Thangue<sup>\*1,5</sup>

<sup>1</sup> Laboratory of Cancer Biology, Department of Oncology, University of Oxford  
Old Road Campus Research Building, Oxford, OX3 7DQ, United Kingdom

<sup>2</sup> Peter Medawar Building for Pathogen Research, University of Oxford, Oxford, OX1  
3SY, United Kingdom

<sup>3</sup> Translational Gastroenterology Unit, Nuffield Department of Medicine, University of  
Oxford, Oxford, OX3 9DU, United Kingdom

<sup>4</sup> Department of Medical Oncology, Cancer Center, West China Hospital, Sichuan  
University, Chengdu, 610041, China

<sup>5</sup> Celleron Therapeutics Ltd, Magdalen Centre, Oxford Science Park, Oxford, OX4  
4GA, United Kingdom

<sup>~</sup> Each author made an equal contribution

\* Corresponding Author email: [nick.lathangue@oncology.ox.ac.uk](mailto:nick.lathangue@oncology.ox.ac.uk)

Running title: HDAC inhibitors augment the anti-covid19 immune response

Keywords: HDAC inhibitors, MHC genes, covid19 spike protein, T and B cells

- Supplementary figures and legends S1-S18
- Supplementary dataset 1

**a**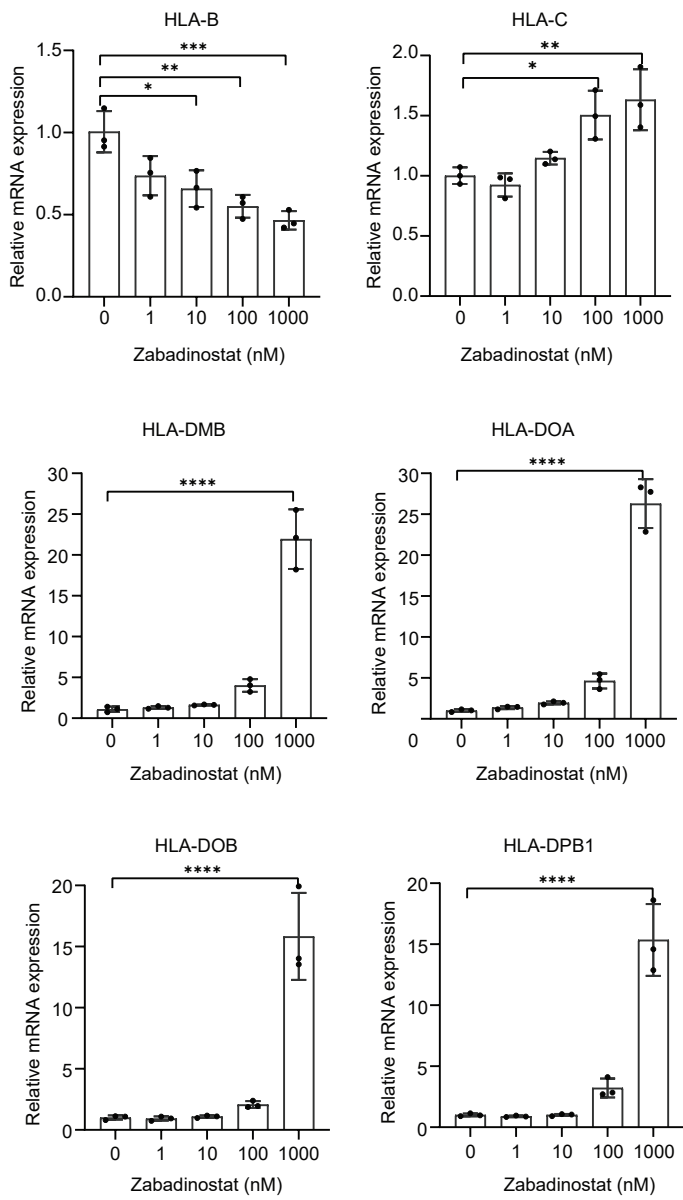**b**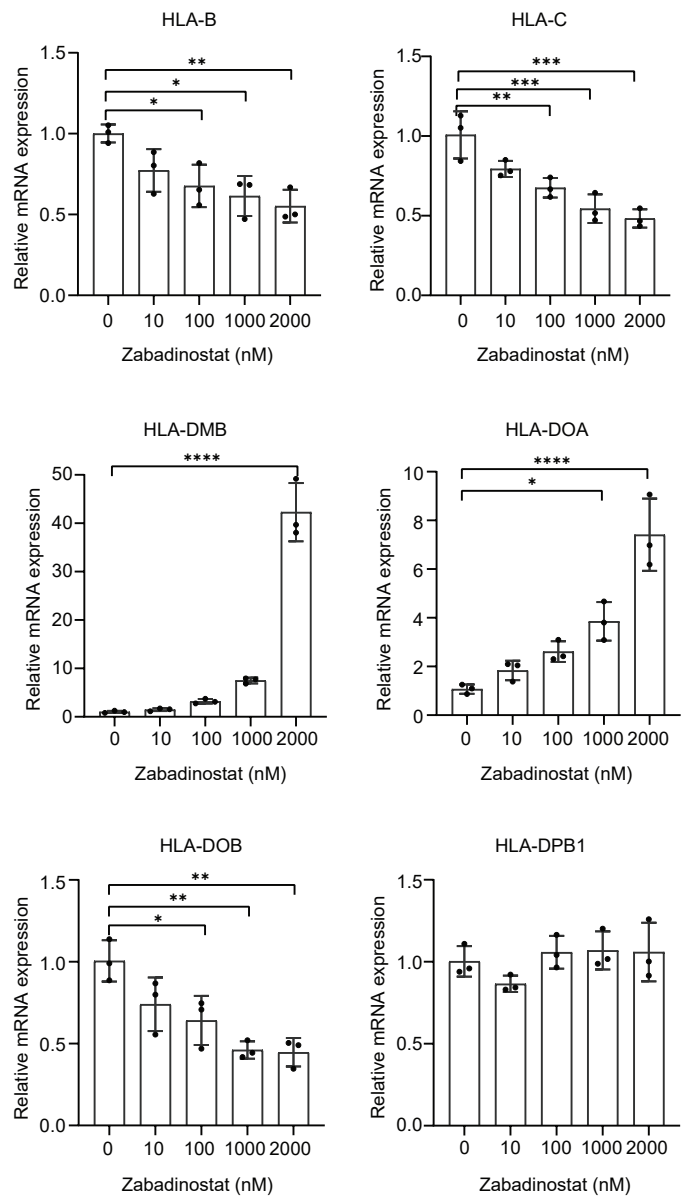**c**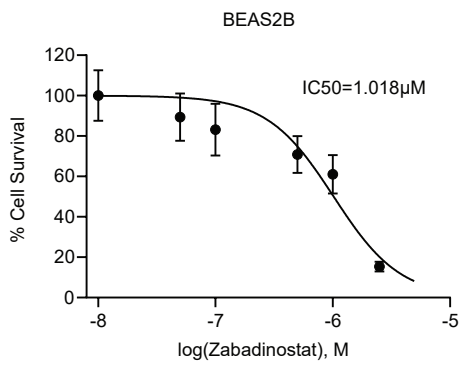**d**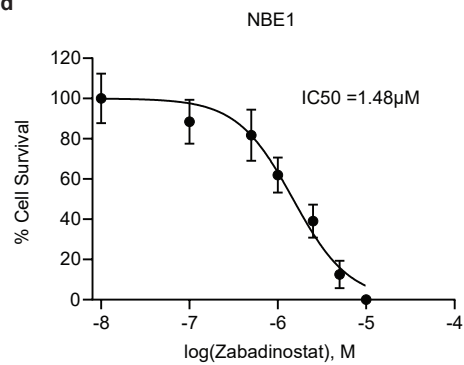

**Supplementary Figure 1. Expression of MHC class I and class II genes upon zabadinostat treatment.** **a)** Quantitative reverse transcription PCR (qRT-PCR) of MHC class I and class II genes in BEAS2B cells treated for 3 days with 1, 10, 100, 1000 nM zabadinostat or DMSO control; n=3; results presented as mean values +/-SD; one-way ANOVA; **b)** Quantitative reverse transcription PCR (qRT-PCR) of MHC class I and class II genes in NBE1 cells treated for 3 days with 10, 100, 1000, 2000 nM zabadinostat or DMSO control; n=3; results presented as mean values +/-SD; one-way ANOVA; **c)** An IC50 graph from MTT assays performed after treating BEAS2B cells for 3 days with increasing concentrations of zabadinostat; n=3, results presented as mean values +/-SD; **d)** An IC50 graph from MTT assays performed after treating NBE1 cells for 3 days with increasing concentrations of zabadinostat; n=3, results presented as mean values +/-SD.

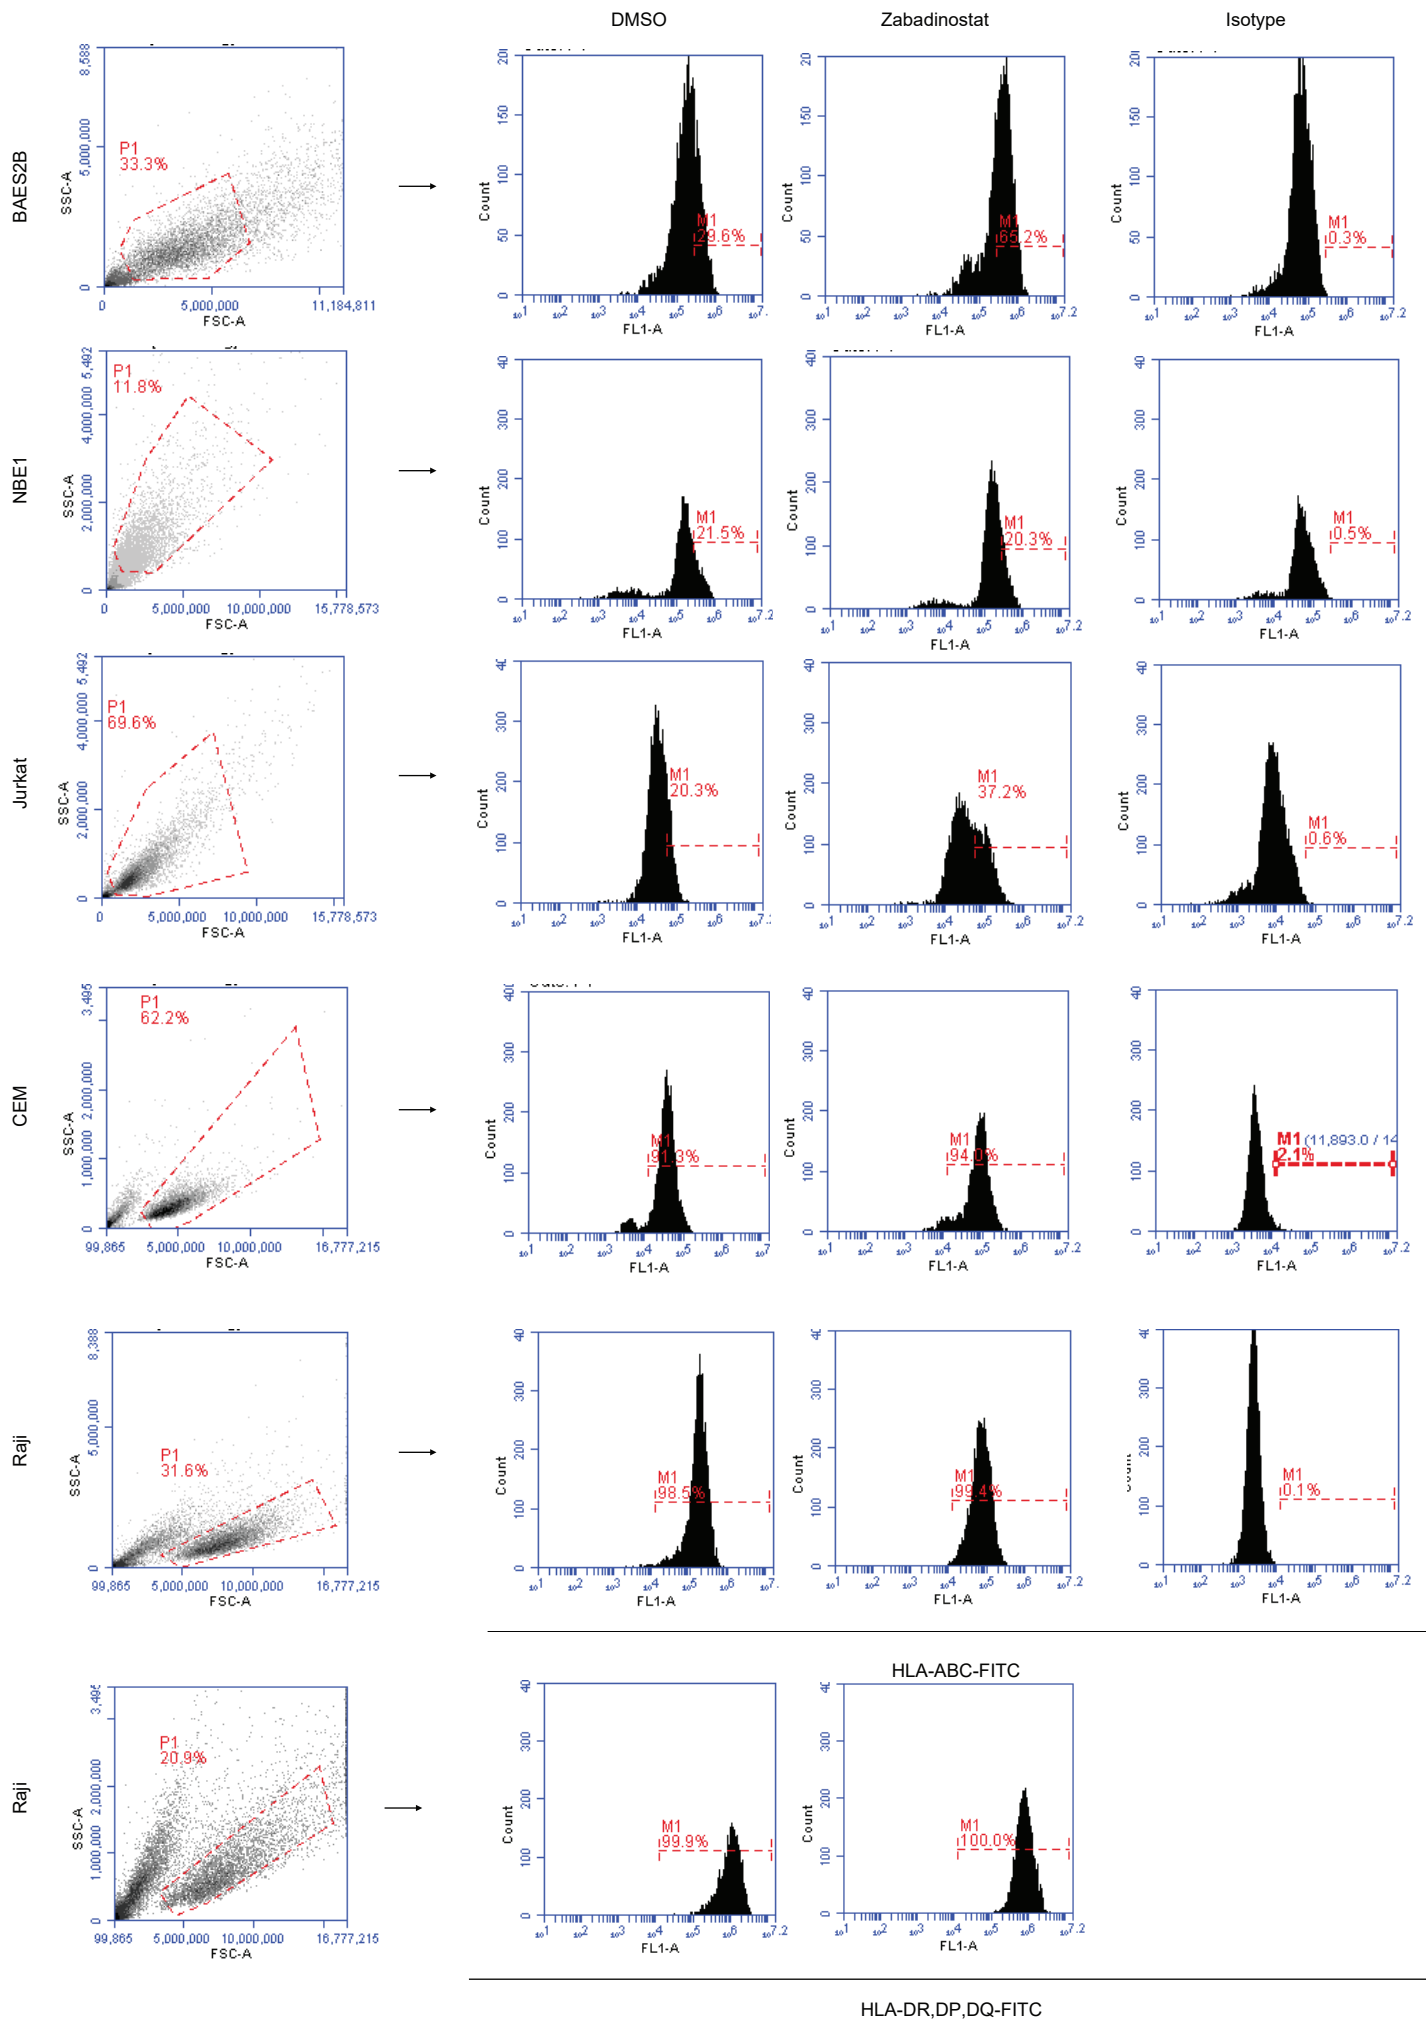

HLA-DR,DP,DQ-FITC



**Supplementary Figure 2. Representative flow cytometry plots and gating strategy for the results presented in the Figure 1c-d and Supplementary Figure 3a-c.**

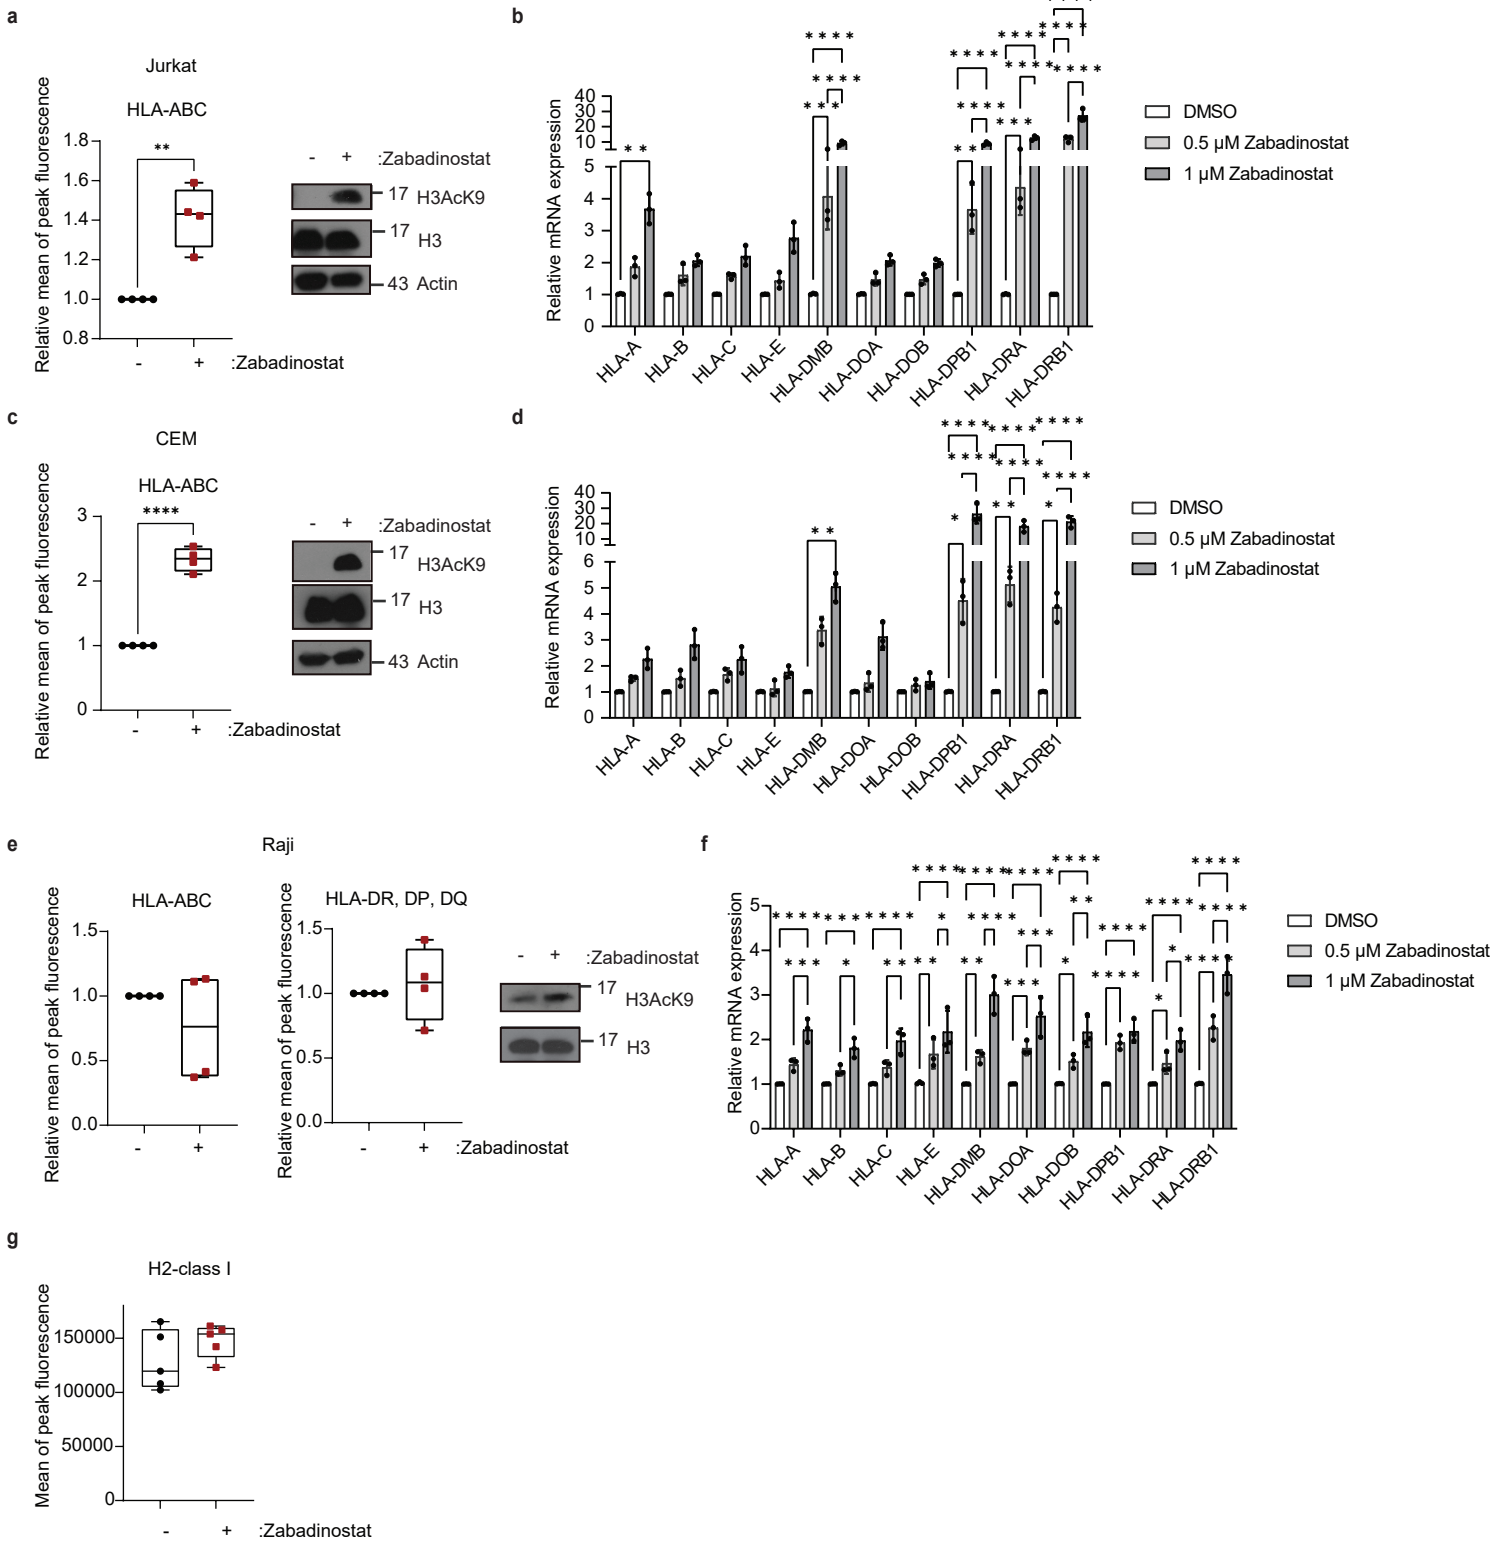

**Supplementary Figure 3. Expression of MHC class I and class II genes upon zabadinostat treatment.** **a)** flow cytometry analysis of extracellular MHC class I proteins in Jurkat cells treated for 2 days with 1  $\mu$ M zabadinostat or DMSO control, n=4, results presented as mean values  $\pm$ -SD, Student's t test; The acetylation mark (H3AcK9) was detected by immunoblotting; **b)** Quantitative reverse transcription PCR (qRT-PCR) of MHC class I and class II genes in Jurkat cells treated for 2 days with 0.5 and 1  $\mu$ M zabadinostat or DMSO control; n=3; results presented as mean values  $\pm$ -SD; one-way ANOVA; **c)** flow cytometry analysis of extracellular MHC class I proteins in CEM cells treated for 2 days with 1  $\mu$ M zabadinostat or DMSO control, n=4, results presented as mean values  $\pm$ -SD, Student's t test; The acetylation mark (H3AcK9) was detected by immunoblotting; **d)** Quantitative reverse transcription PCR (qRT-PCR) of MHC class I and class II genes in CEM cells treated for 2 days with 0.5 and 1  $\mu$ M zabadinostat or DMSO control; n=3; results presented as mean values  $\pm$ -SD; one-way ANOVA; **e)** flow cytometry analysis of extracellular MHC class I and II proteins in Raji cells treated for 2 days with 1  $\mu$ M zabadinostat or DMSO control, n=4; The acetylation mark (H3AcK9) was detected by immunoblotting; **f)** Quantitative reverse transcription PCR (qRT-PCR) of MHC class I and class II genes in Raji cells treated for 2 days with 0.5 and 1  $\mu$ M zabadinostat or DMSO control; n=3; results presented as mean values  $\pm$ -SD; one-way ANOVA; **g)** flow cytometry analysis of extracellular MHC class I in bone marrow (collected from C57BL/6)-derived dendritic cells (CD11c<sup>+</sup>/CD86<sup>+</sup>) (from Figure 3a) treated with 1  $\mu$ M zabadinostat or DMSO control for 48 hours; n=5.



**Supplementary Figure 4. CIITA is a positive regulator of MHC class I and class II gene expression in HCT116 cells.** **a)** An IC<sub>50</sub> graph from MTT assays performed after treating HCT116 cells for 3 days with increasing concentrations of zabadinostat; n=3, results presented as mean values +/-SD; **b)** Quantitative reverse transcription PCR (qRT-PCR) of CIITA in HCT116 cells treated for 3 days with 10, 100, 1000 nM zabadinostat or DMSO control; n=3; results presented as mean values +/-SD; one-way ANOVA; **c)** The expression of CIITA after siRNA treatment were detected by qRT-PCR; results presented as mean values +/-SD; one-way ANOVA; **d)** Quantitative reverse transcription PCR (qRT-PCR) of MHC class I and class II genes in HCT116 cells treated for 2 days with 50nM siCIITA and for 3 days with 10, 100, 1000 nM zabadinostat or DMSO control; n=3; results presented as mean values +/-SD; one-way ANOVA;.

**a**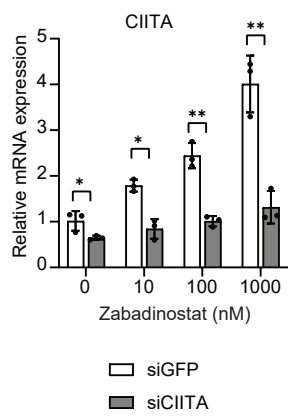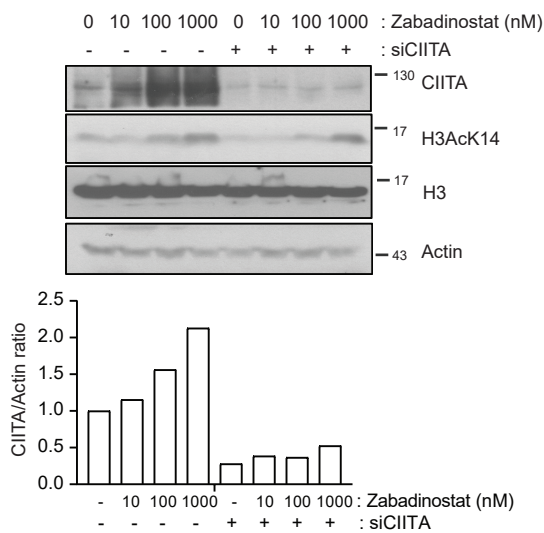**b**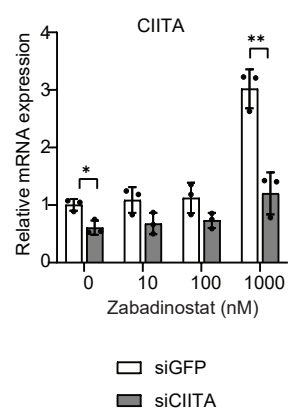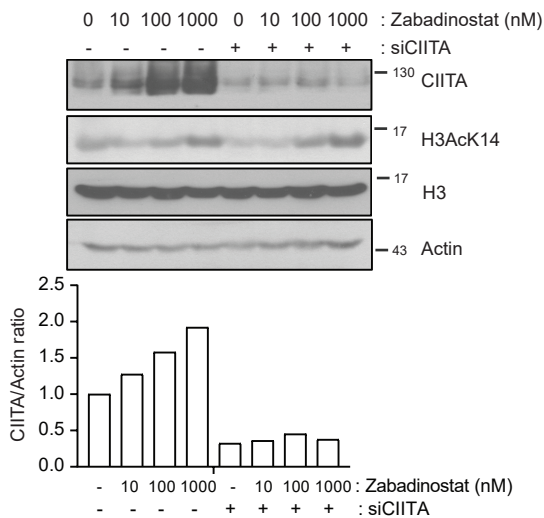**d**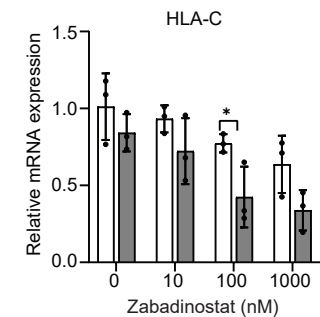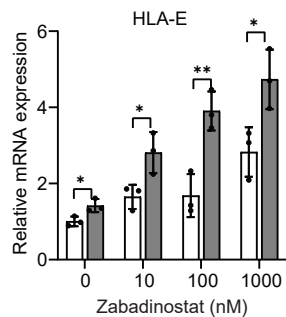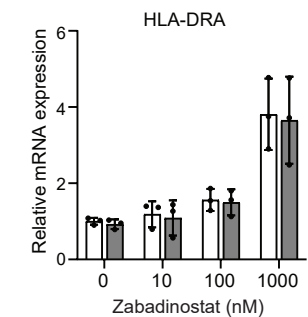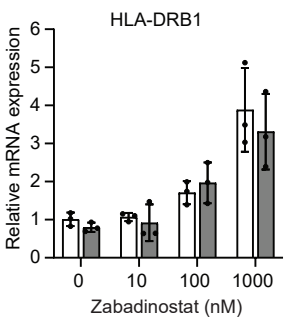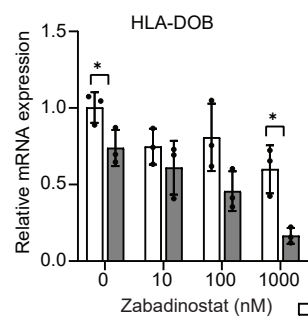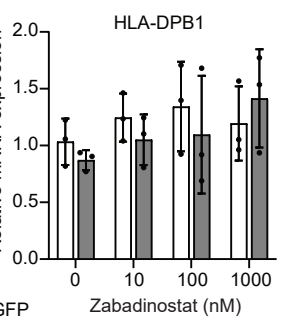**c**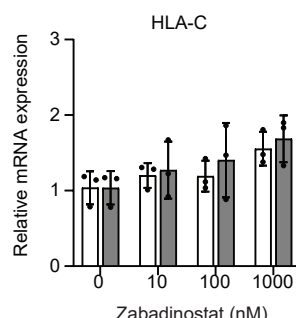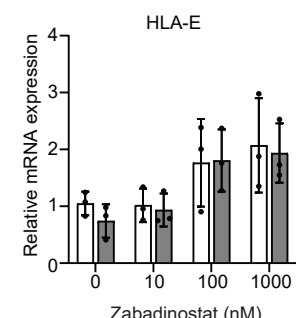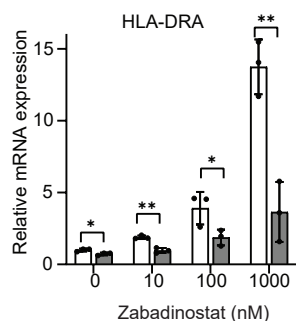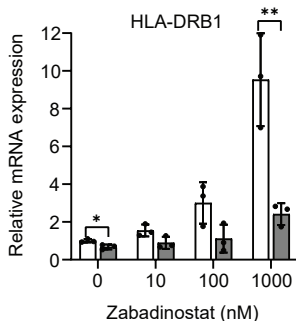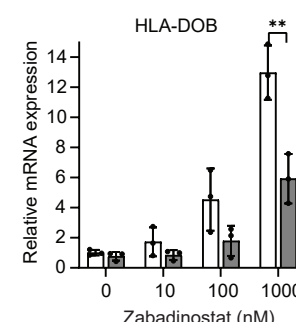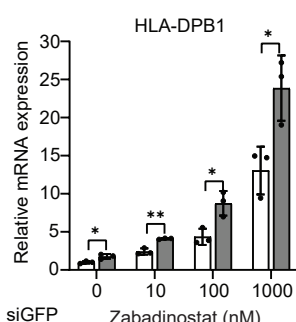**e**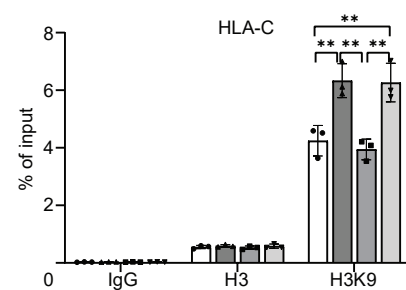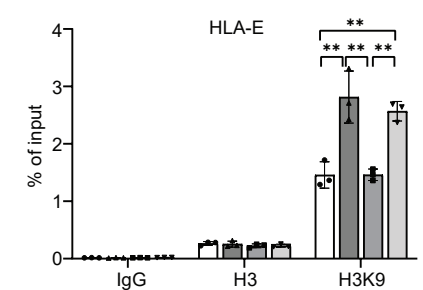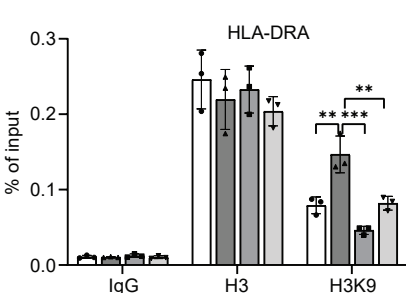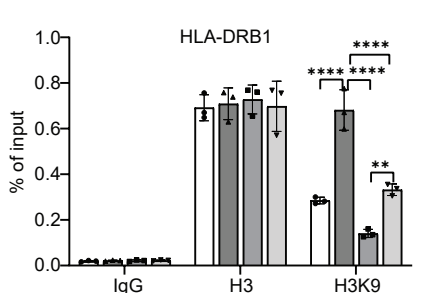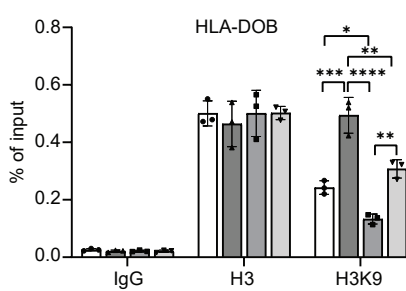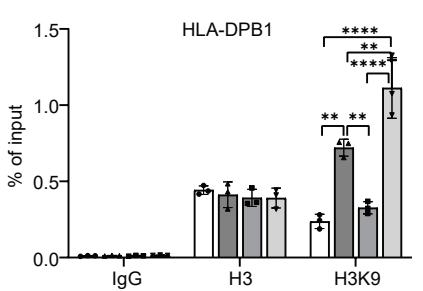

Legend for panels d and e:  
 siGFP+DMSO (white bar), siCIITA+DMSO (grey bar), siGFP+Zabadinostat (light grey bar), siCIITA+Zabadinostat (dark grey bar).

**Supplementary Figure 5. CIITA is a positive regulator of MHC class I and class II genes in BEAS2B and NBE1 cells.** **a)** The expression of CIITA after siRNA treatment were detected by qRT-PCR, n=3; results presented as mean values +/-SD; one-way ANOVA; The CIITA protein level and acetylation mark (H3AcK14) were detected by immunoblotting and quantified; **b)** The expression of CIITA after siRNA treatment was detected by qRT-PCR, n=3; results presented as mean values +/-SD; one-way ANOVA; The CIITA protein level and acetylation mark (H3AcK14) were detected by immunoblotting and quantified; **c)** Quantitative reverse transcription PCR (qRT-PCR) of MHC class I and class II genes in BEAS2B cells treated for 2 days with 50nM siCIITA and for 3 days with 10, 100, 1000 nM zabadinostat or DMSO control; n=3; results presented as mean values +/-SD; one-way ANOVA; **d)** Quantitative reverse transcription PCR (qRT-PCR) of MHC class I and class II genes in NBE1 cells treated for 2 days with 50nM siCIITA and for 3 days with 10, 100, 1000 nM zabadinostat or DMSO control; n=3; results presented as mean values +/-SD; one-way ANOVA; **e)** Histone H3 and H3AcK9 CHIP on MHC gene promoters in BEAS2B cells treated for 2 days with 50nM siCIITA and for 3 days with 1000 nM zabadinostat or DMSO control; n=3; results presented as mean values +/-SD; one-way ANOVA.

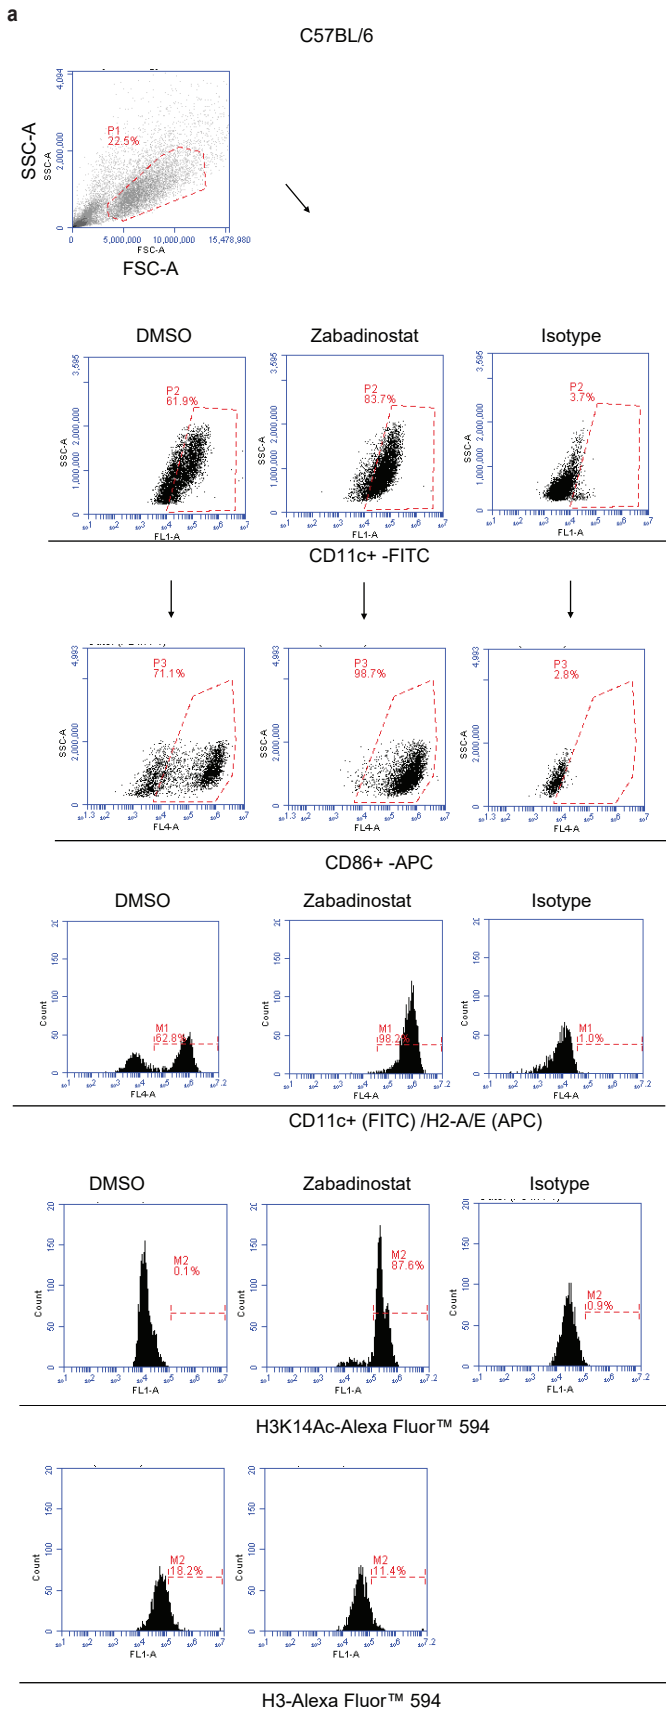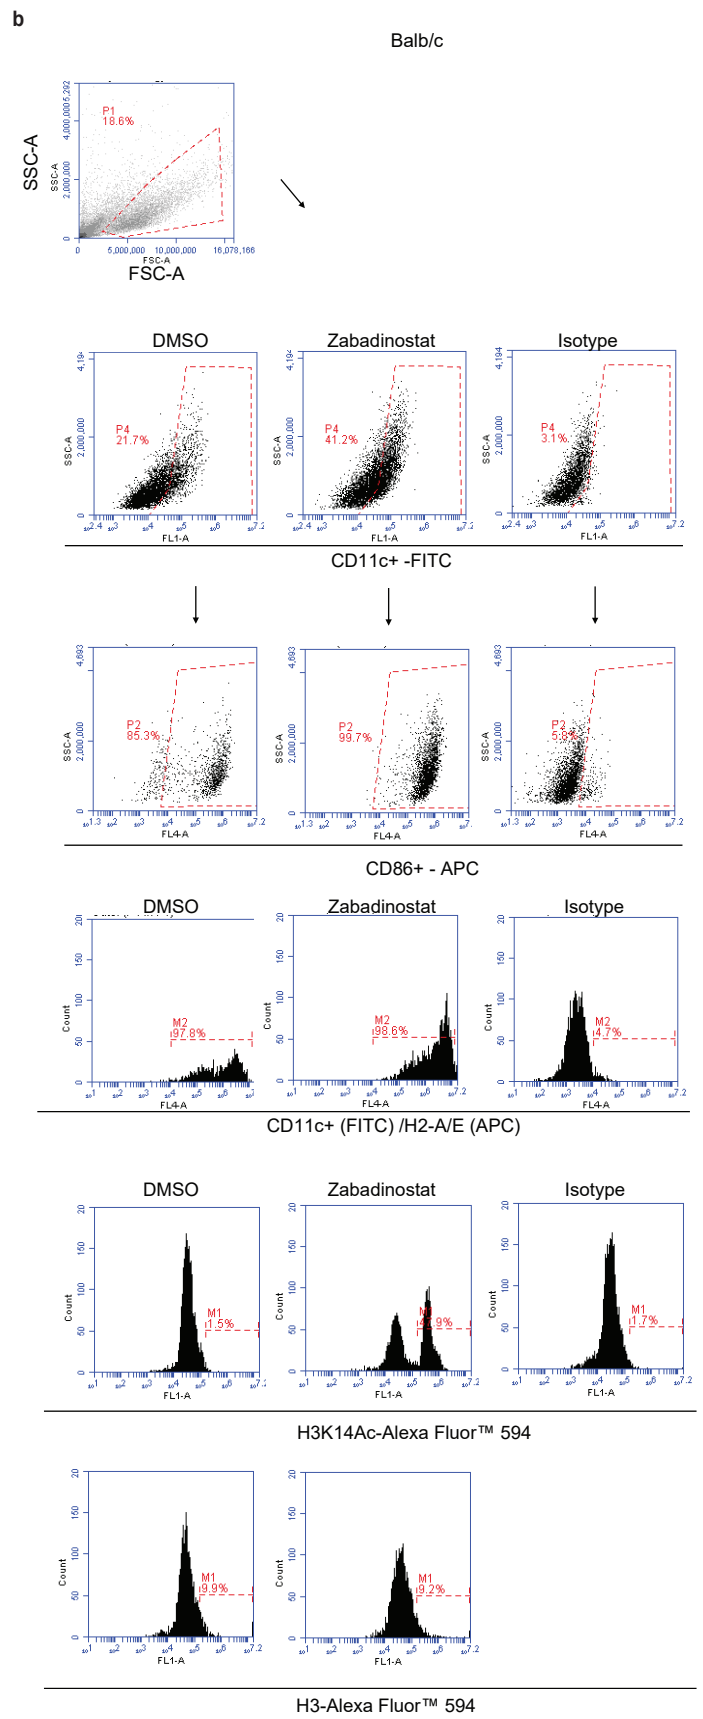



**Supplementary Figure 6. Representative flow cytometry plots and gating strategy (a-b) for the results presented in the Figure 3a and 3c.**

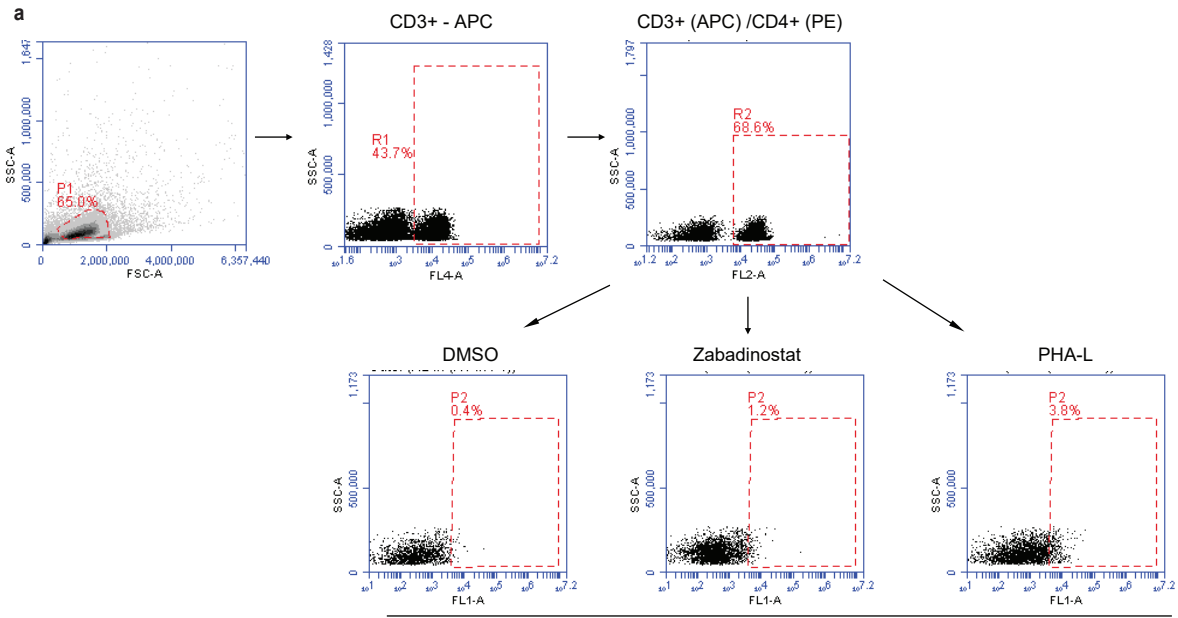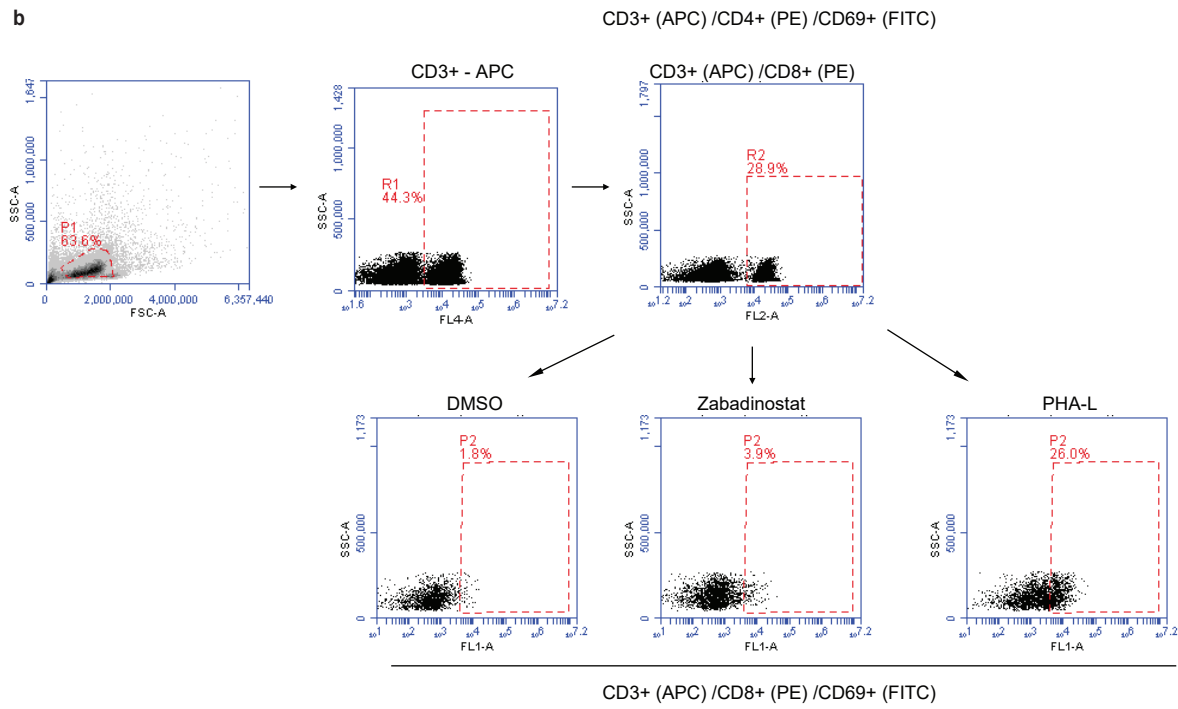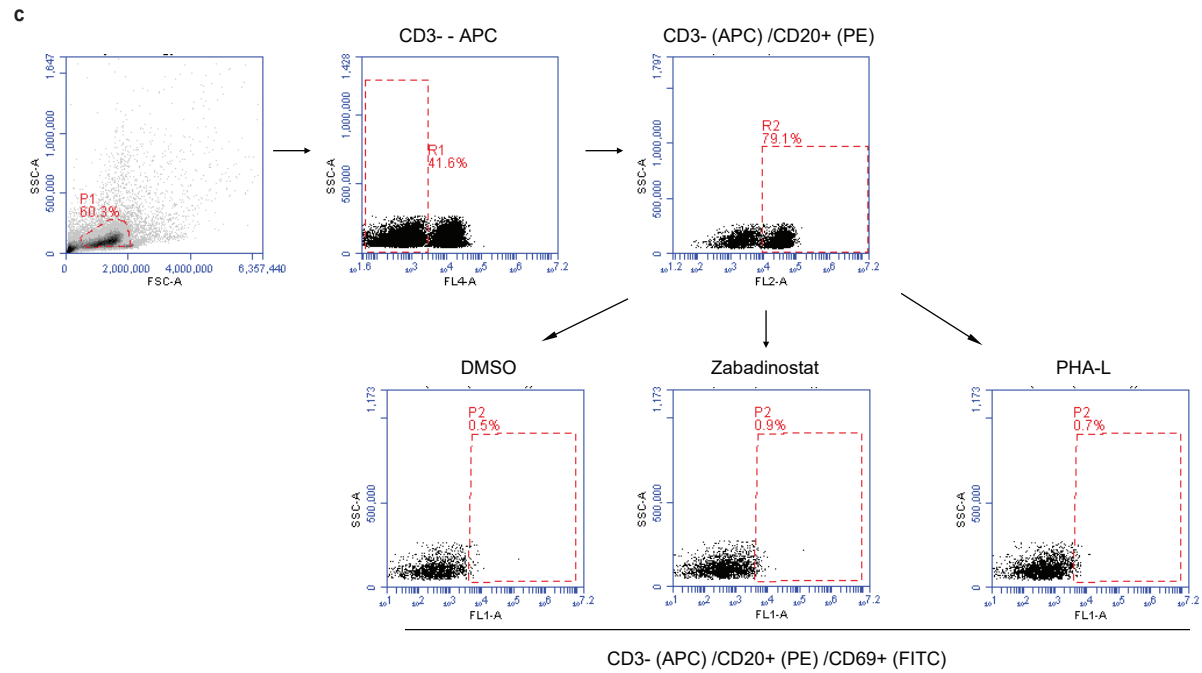

**Supplementary Figure 7. Representative flow cytometry plots and gating strategy (a-c) for the results presented in the Figure 3d.**

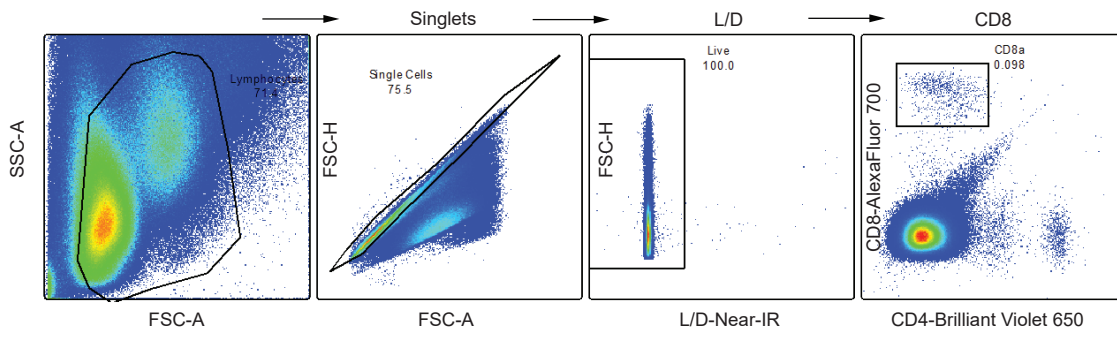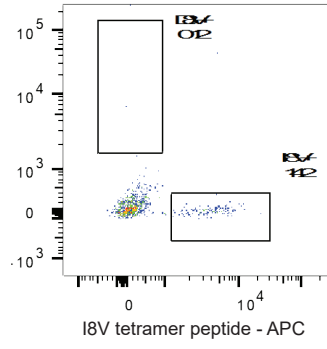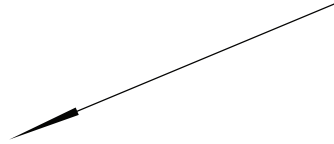

**Supplementary Figure 8. Representative flow cytometry plots and gating strategy for the results presented in the Figure 4c-d.**

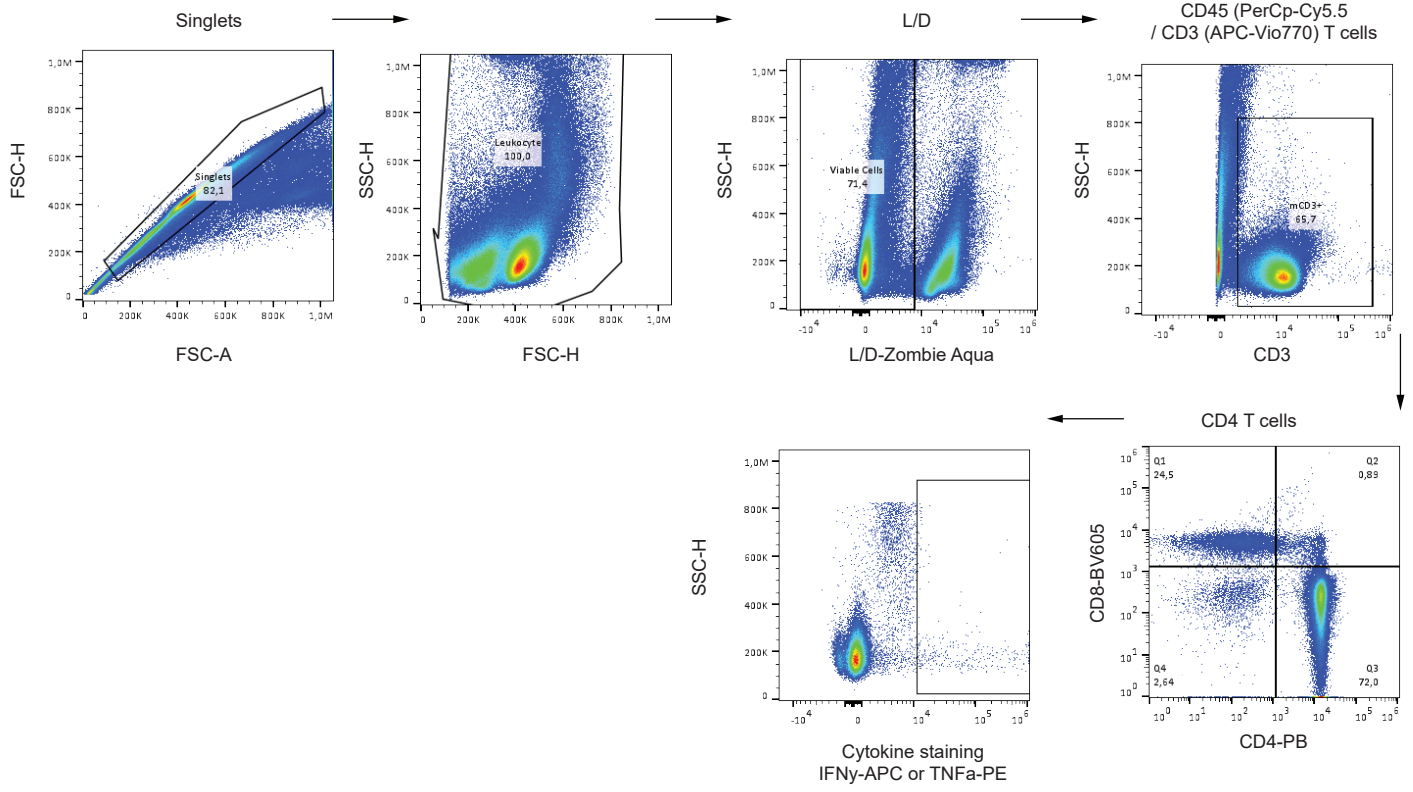

**Supplementary Figure 9. Representative flow cytometry plots and gating strategy for the results presented in the Figure 5c and Supplementary Figure 15.**

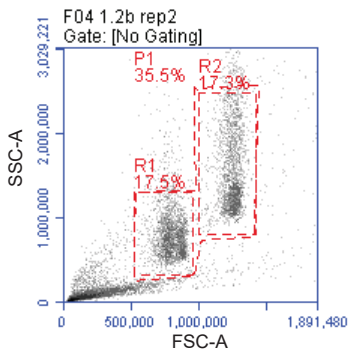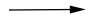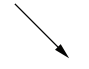

Beads A

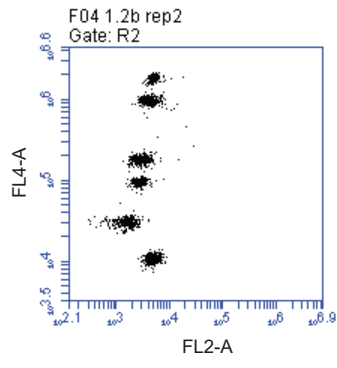

Beads B

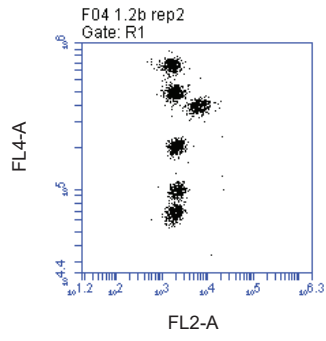



**Supplementary Figure 10. Representative flow cytometry plots and gating strategy for the results presented in the Figure 5d and Supplementary Figure 11.**

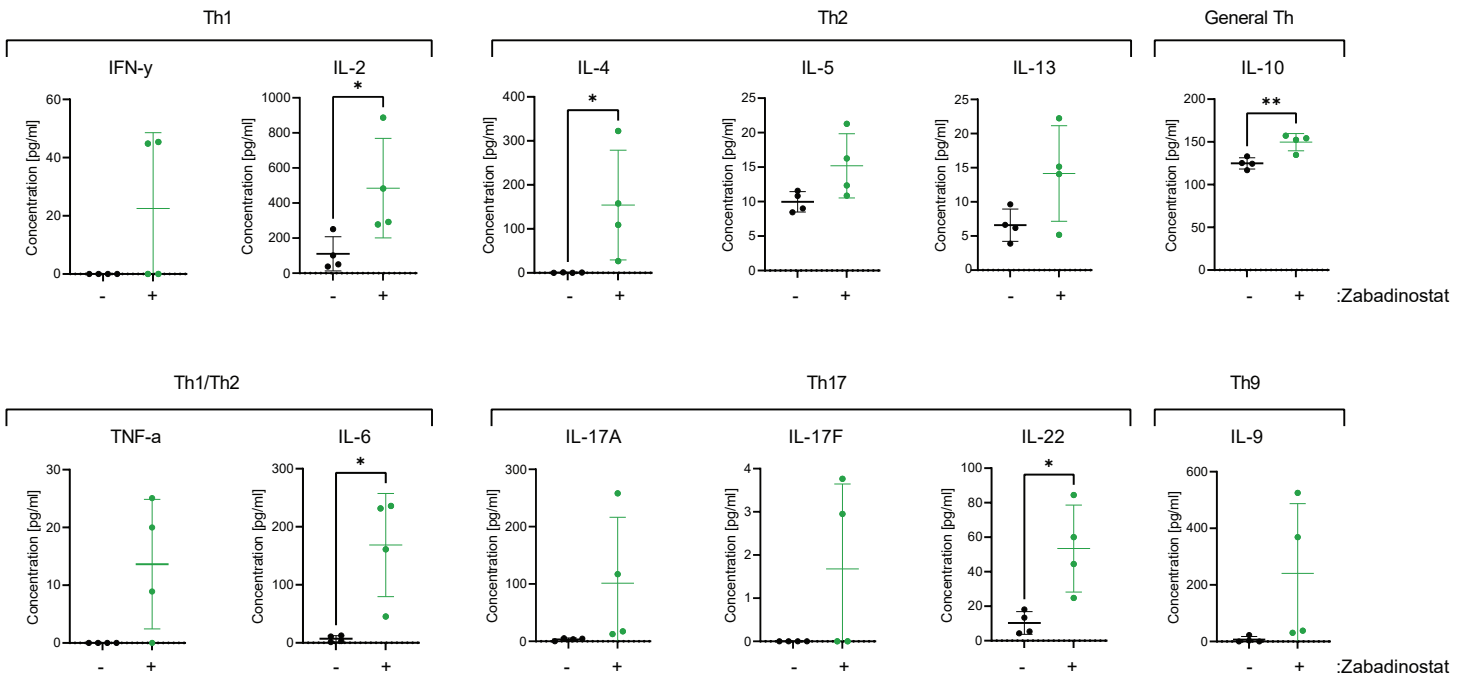

**Supplementary Figure 11. Zabadinostat increases cytokine release.** Analysis of panel of Th1, Th2, Th1/Th2, General Th, Th17, and Th9 cytokines in serum collected from mice treated with zabadinostat and the control group; Balb/c mice were treated with orally administrated zabadinostat at 25 mg/kg for 14 days (5 days on/2 days off) or vehicle only; n=4 per group; results presented as mean values +/-SD; Student's t test.

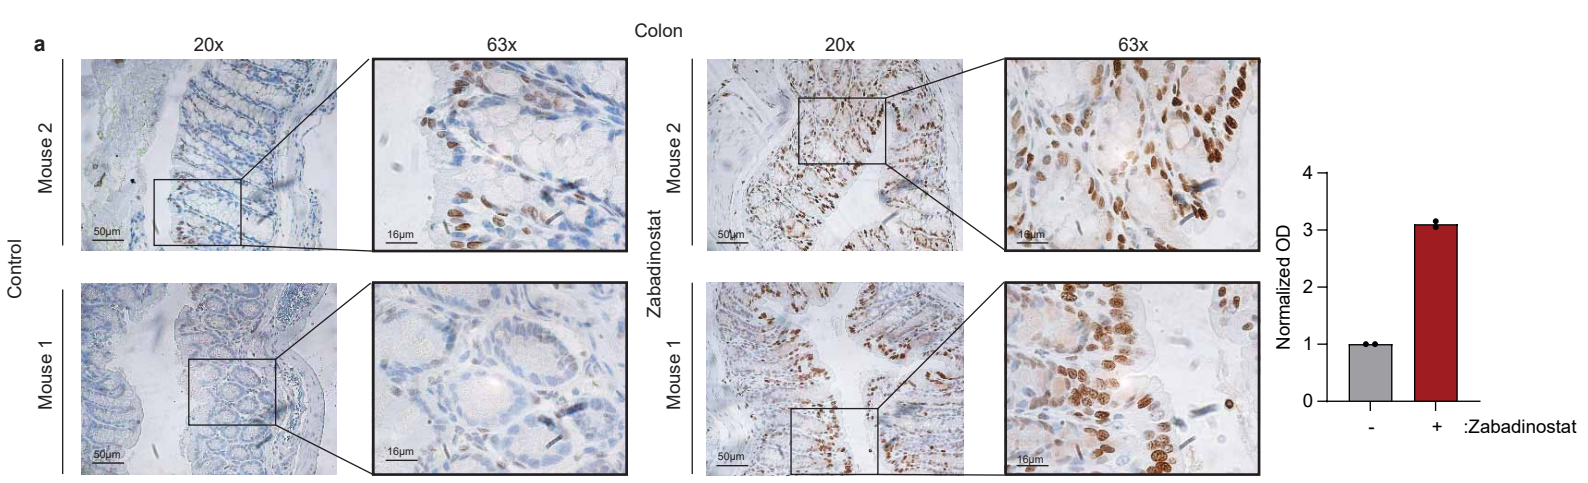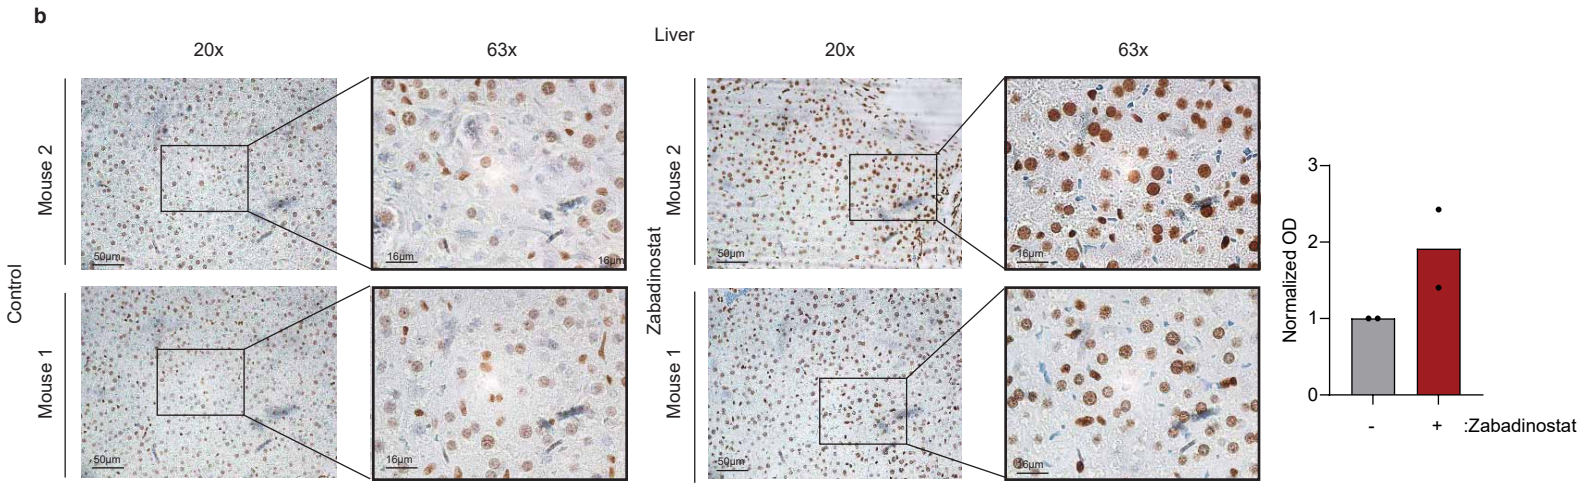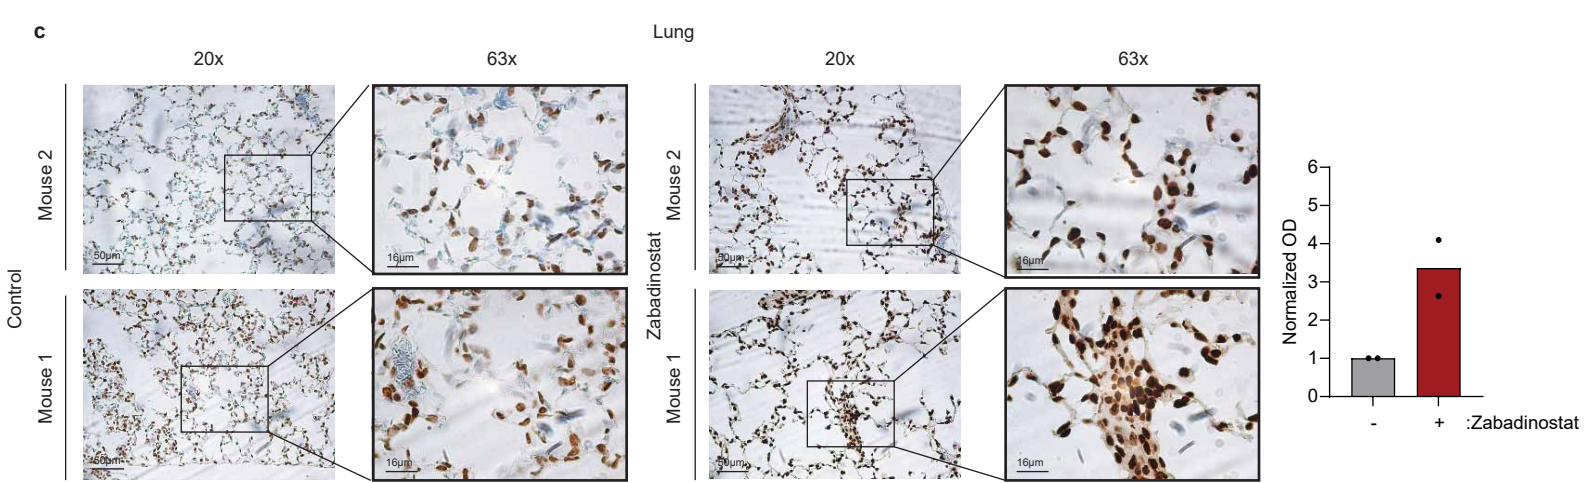

**Supplementary Figure 12. Zabadinostat efficacy in different tissues.**

Representative examples of immunohistochemical staining of H3AcK9 in colon **(a)**, liver **(b)**, and lung **(c)** collected from Balb/c mice at 14 days treated with 25 mg/kg zabadinostat and non-treated control (5 days on/2 days off). Original magnification: 20x, scale bar, 50  $\mu\text{m}$ ; and 63x; scale bar, 16  $\mu\text{m}$ . n=2; results were quantified by ImageJ Fiji software and normalised optical density was presented as a mean +/- SD. Statistical analysis was performed using two-tailed, unpaired Student's t-test with GraphPad Prism 8 software, n=2.



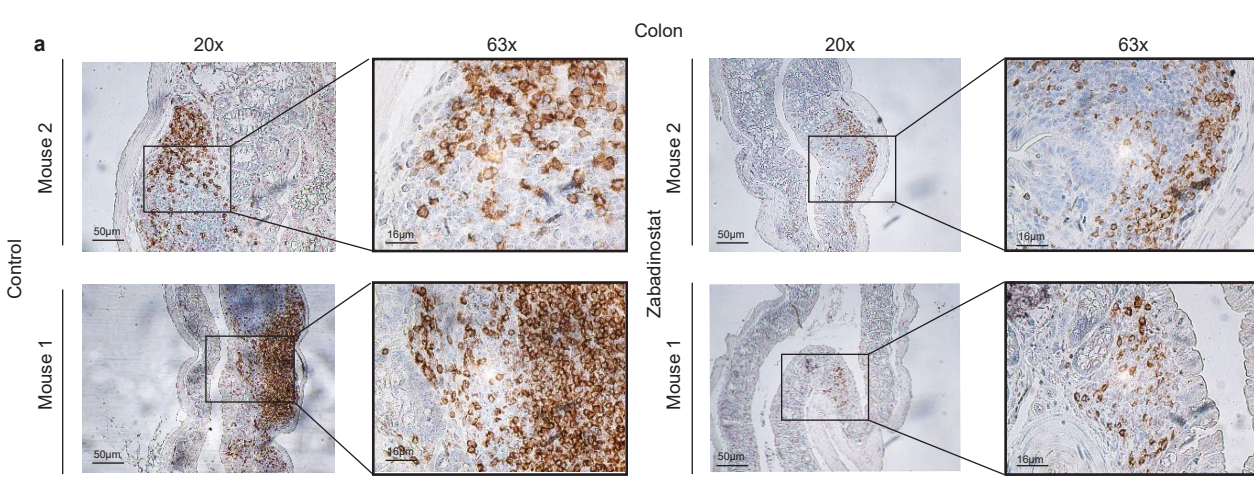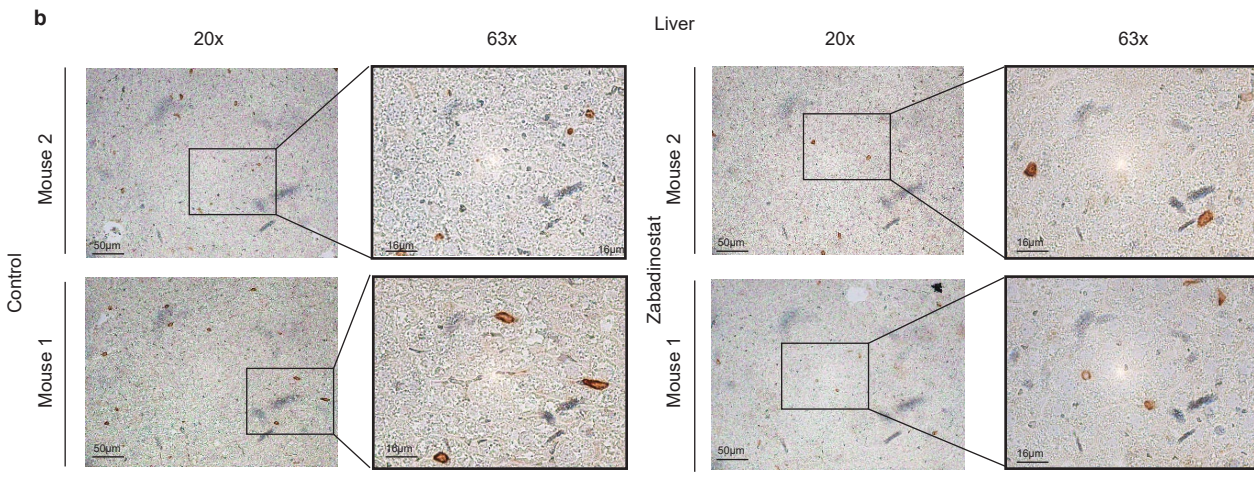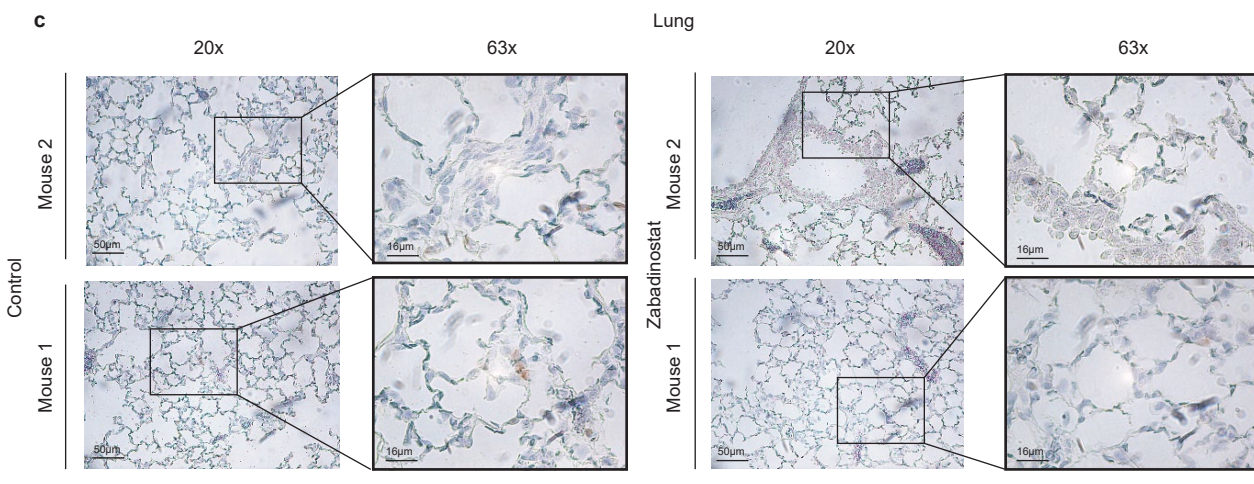

**Supplementary Figure 13. CD4 T cell infiltration in different tissues upon zabadinostat treatment.** Representative examples of immunohistochemical staining of CD4 T cells in colon **(a)**, liver **(b)**, and lung **(c)** collected from Balb/c mice at 14 days treated with 25 mg/kg zabadinostat and non-treated control (5 days on/2 days off). Original magnification: 20x, scale bar, 50  $\mu\text{m}$ ; and 63x; scale bar, 16  $\mu\text{m}$ . n=2.



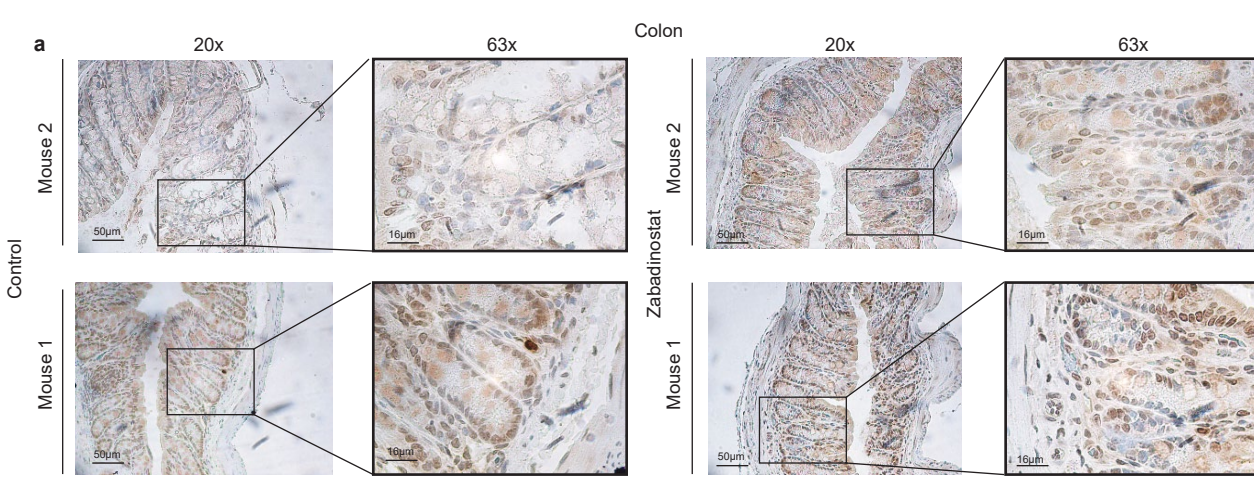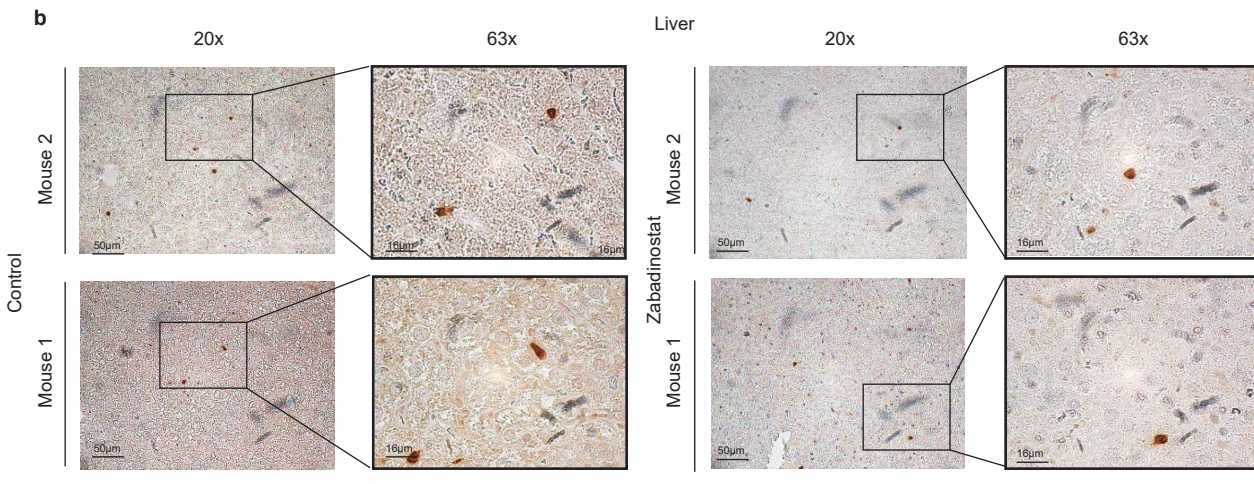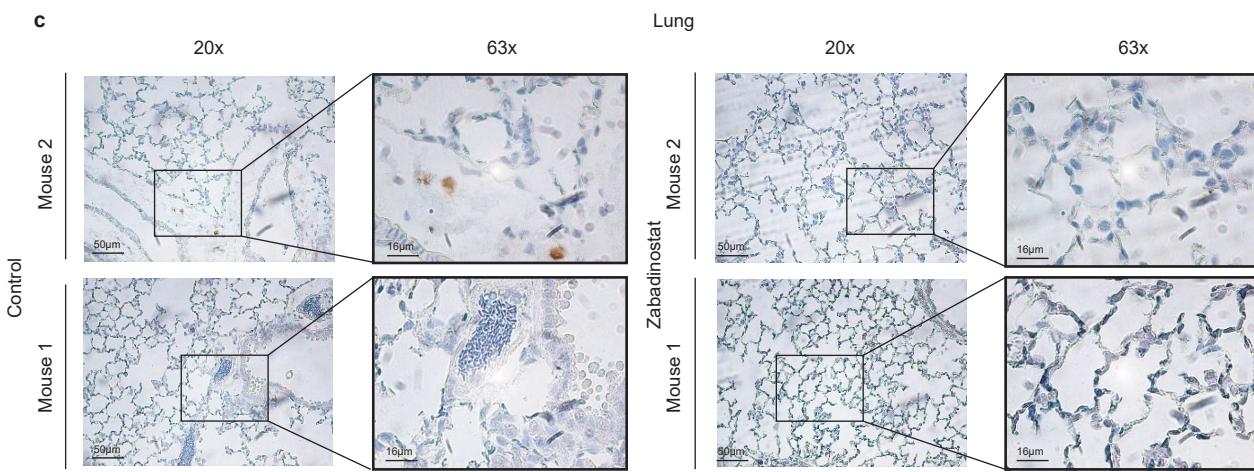



**Supplementary Figure 14. CD8 T cell infiltration in different tissues upon zabadinostat treatment.** Representative examples of immunohistochemical staining of CD8 T cells in colon **(a)**, liver **(b)**, and lung **(c)** collected from Balb/c mice at 14 days treated with 25 mg/kg zabadinostat and non-treated control (5 days on/2 days off). Original magnification: 20x, scale bar, 50  $\mu\text{m}$ ; and 63x; scale bar, 16  $\mu\text{m}$ . n=2.

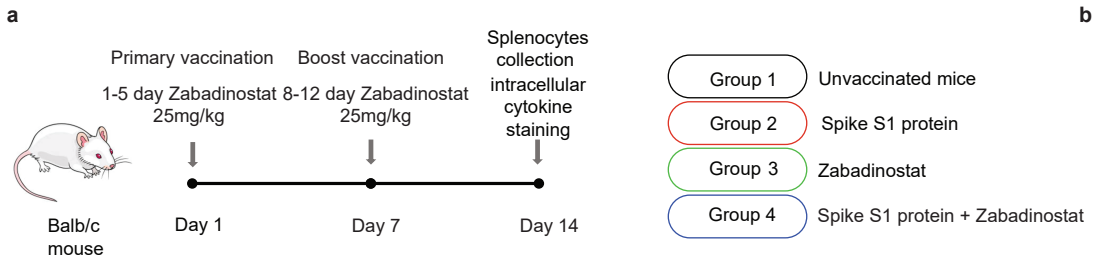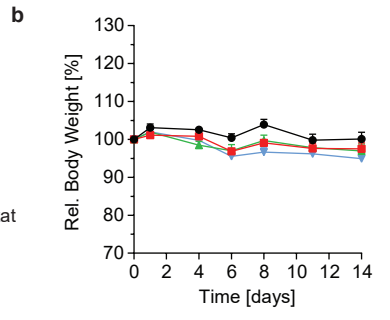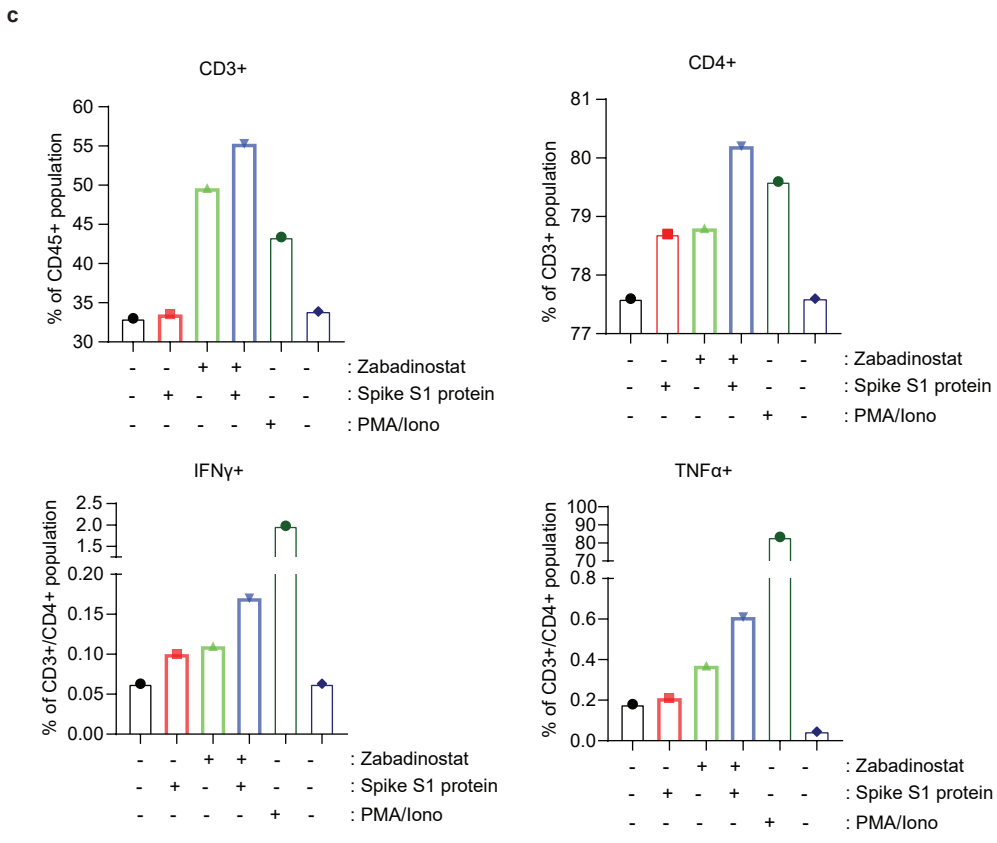

**Supplementary Figure 15. Zabadinostat enhances the T cell response to covid spike S1 protein.** **a)** Schematic representation of the experiment. Balb/c mice were treated with orally administrated zabadinostat at 25 mg/kg for 14 days (5 days on/2 days off) and intravenous spike S1 protein (days 1 and 7) with respect to vehicle only control; n=4 per group; **b)** relative body weight representation of treated and non-treated mice; results presented as mean values +/-SD; **c)** General CD3 positive T cell activation, CD4 positive T cells, and IFN $\gamma$ , TNF $\alpha$  intracellular cytokine staining (within CD4 positive cell population) measurements by flow cytometry; measurements were performed in pooled splenocytes from 4 mice; also, we noticed similar percentage of CD8 positive T cells in control and zabadinostat treated groups (18.4% and 16%). Noteworthy, viability of the splenocytes was similar in zabadinostat treatment compare to untreated control (67.3% and 74.2% viable cells, respectively).

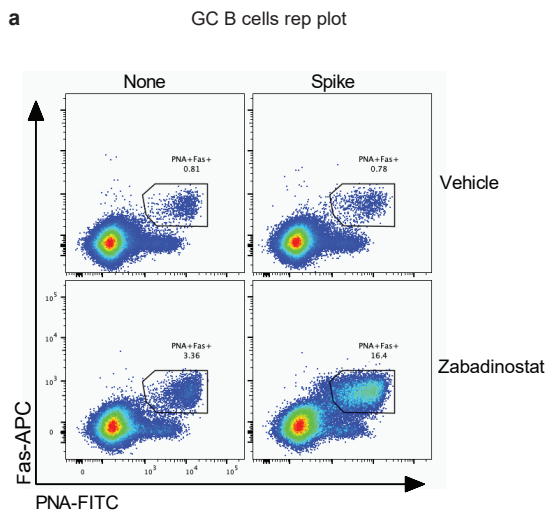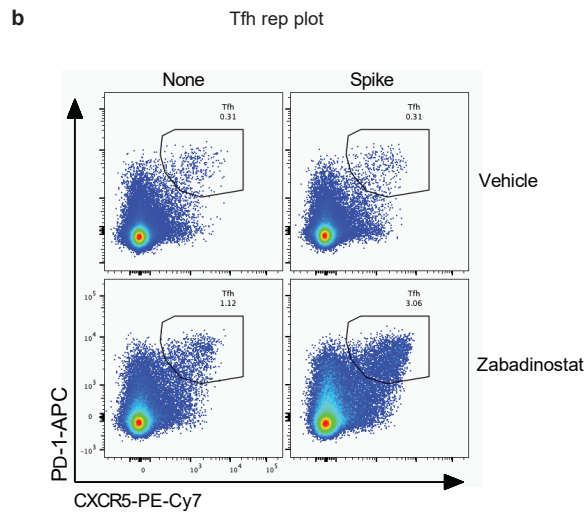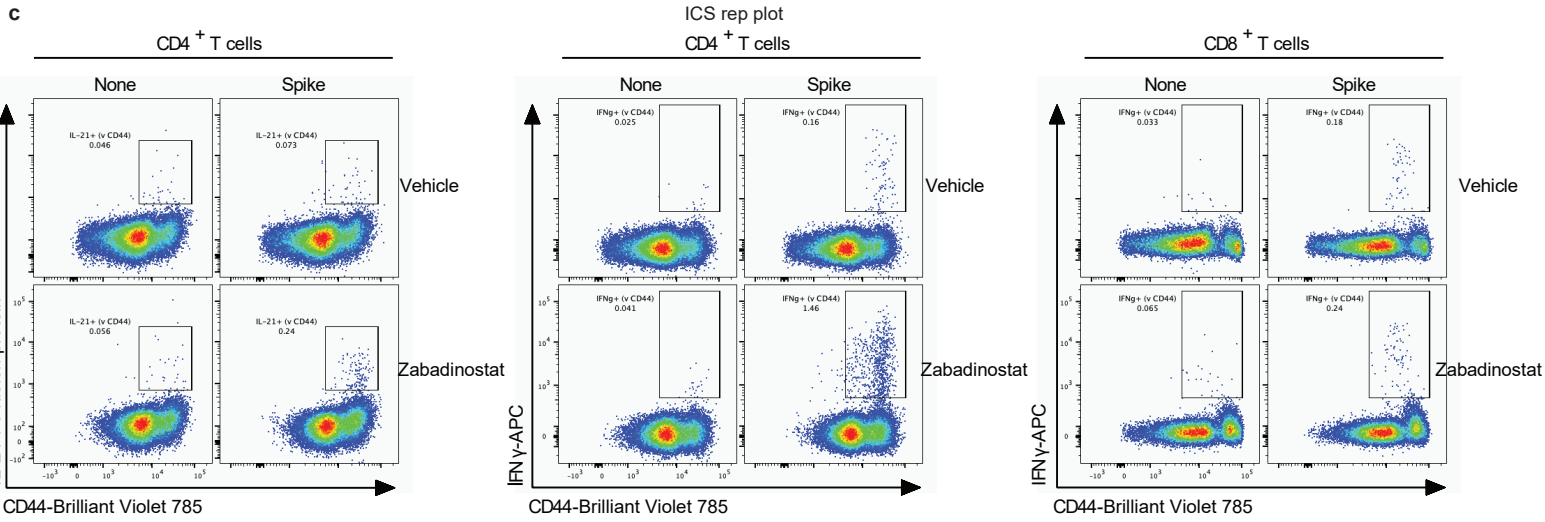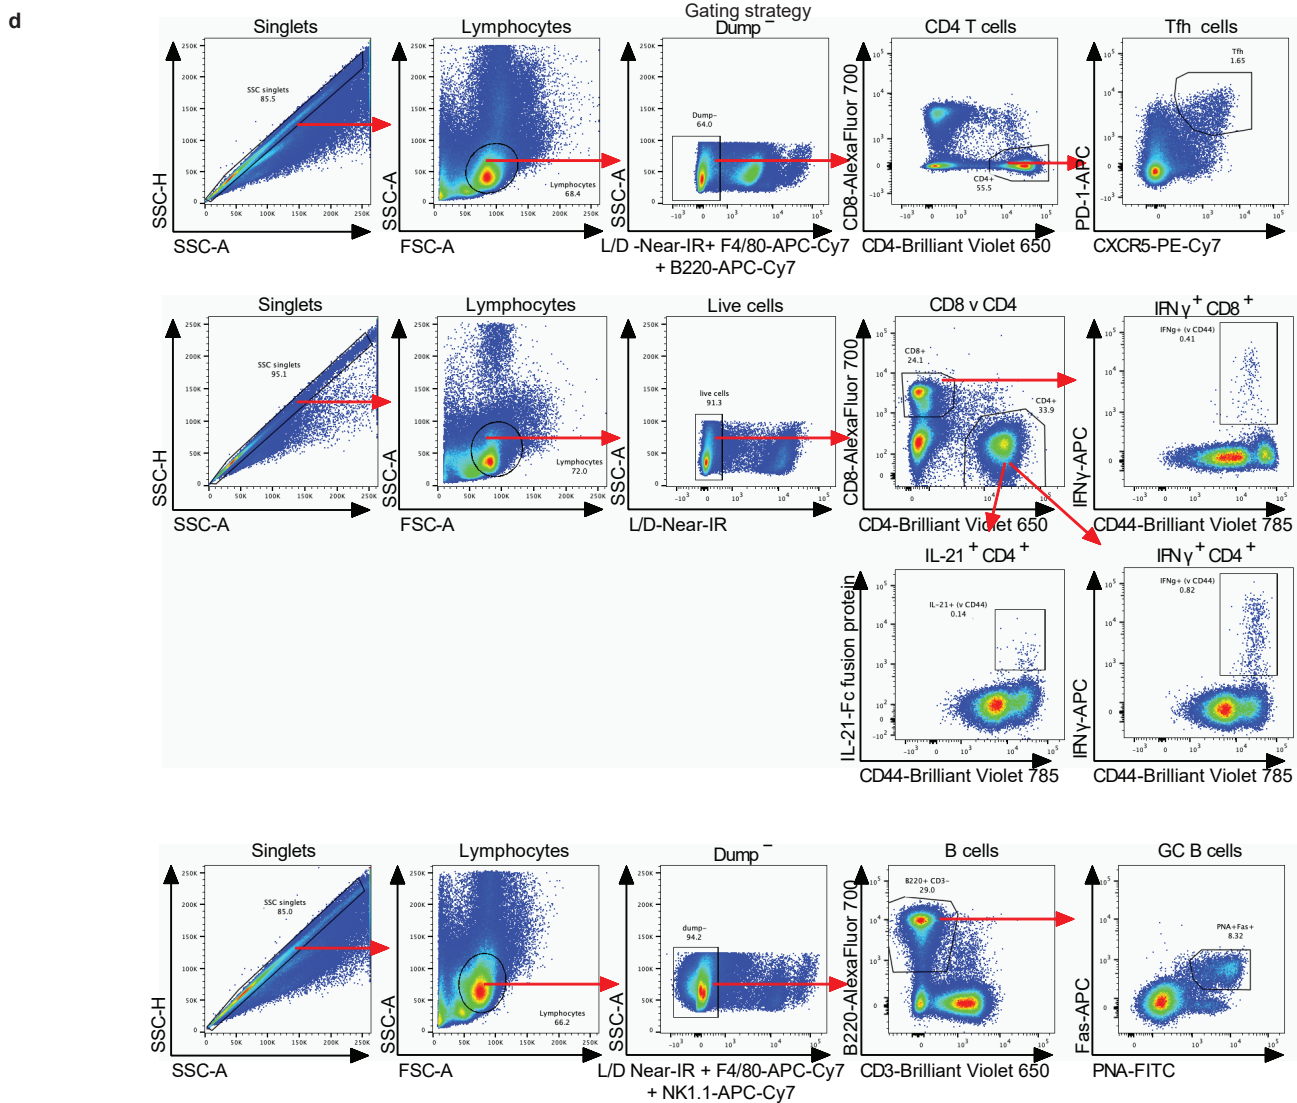

**Supplementary Figure 16. Representative flow cytometry plots and gating strategy (a-d) for the results presented in the Figure 7c.**

**a** Figure 1a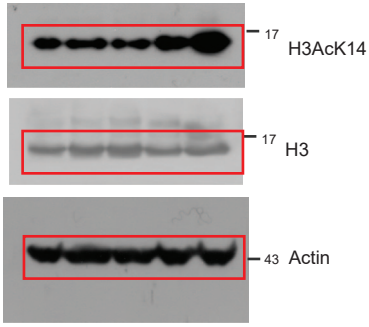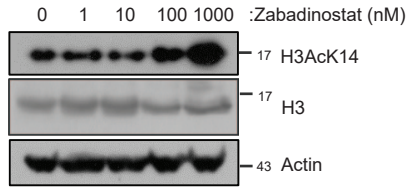**b** Figure 1b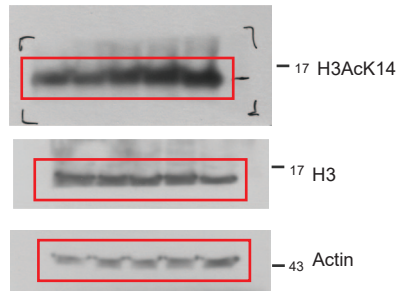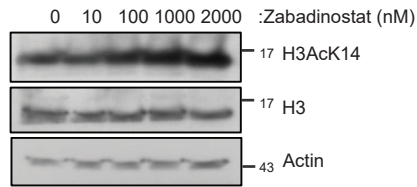**c** Figure 1e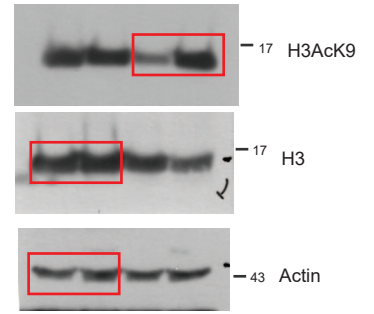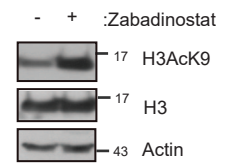**d** Figure 1f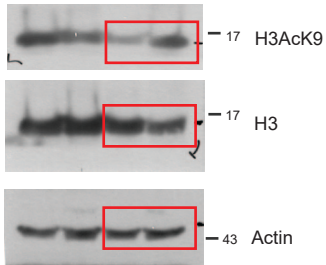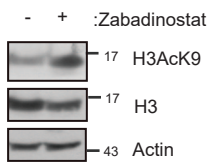**e** Figure 2a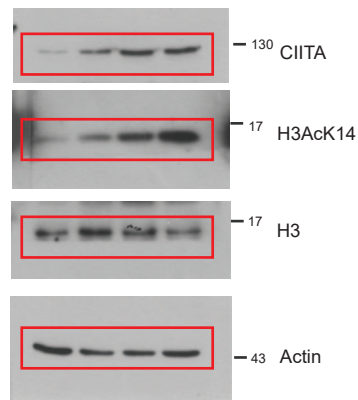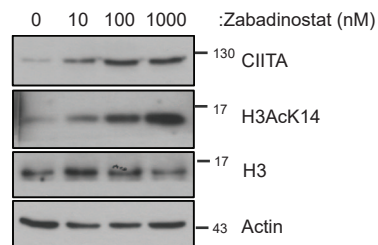**f** Figure 2b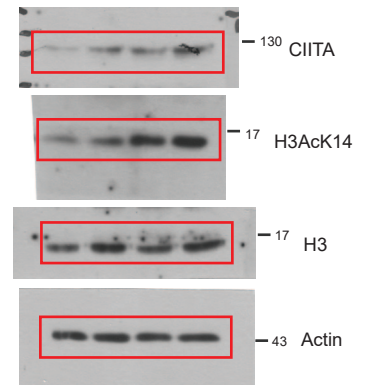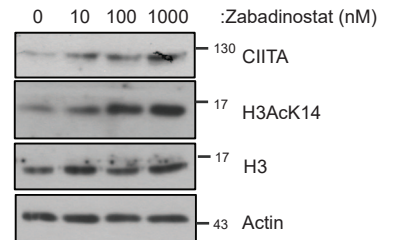**g** Figure 2e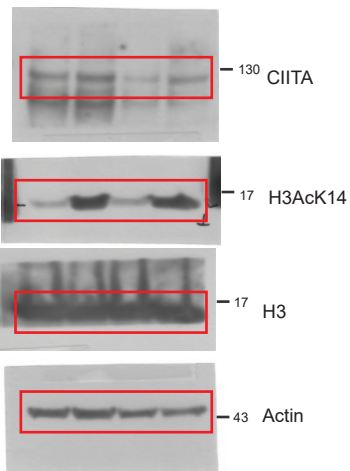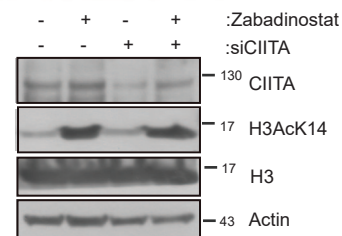**h** Supplementary Figure 5a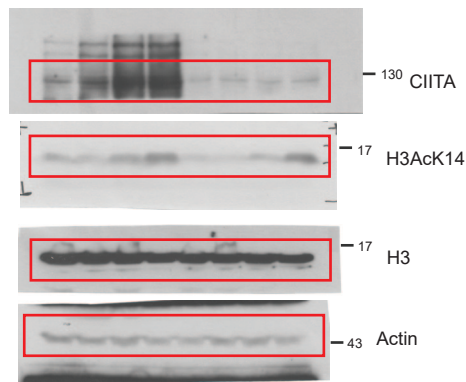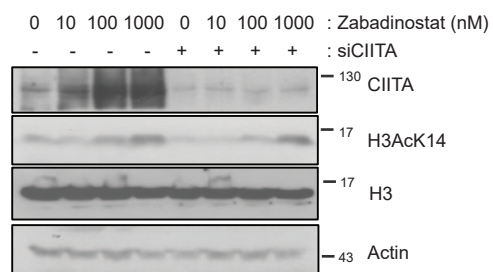**i** Supplementary Figure 5b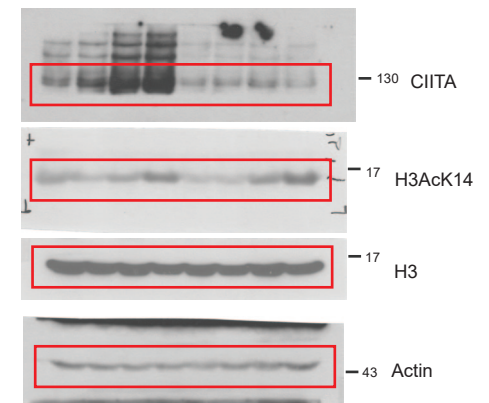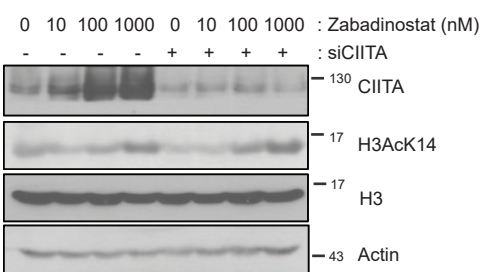

**Supplementary Figure 17. Uncropped versions of immunoblots used in the Figures 1a, 1b, 1e, 1f, 2a, 2b, 2e, Supplementary Figure 5a, and 5b.**

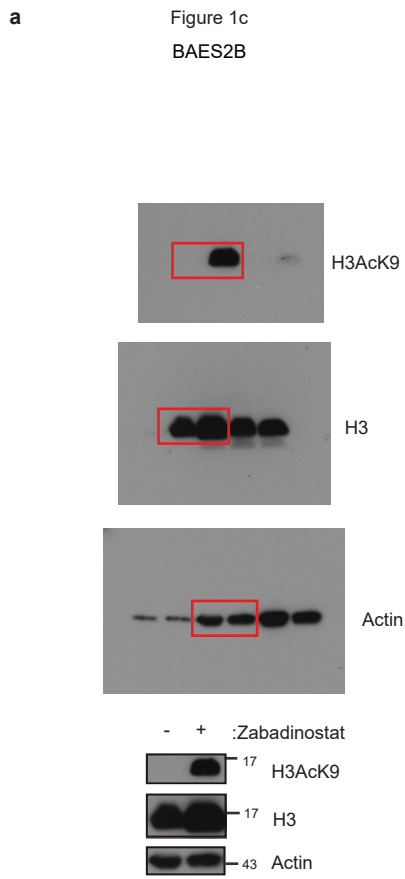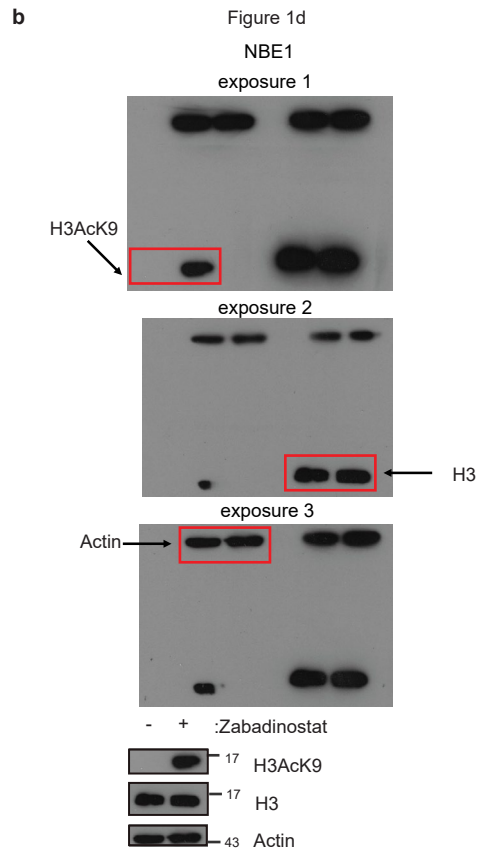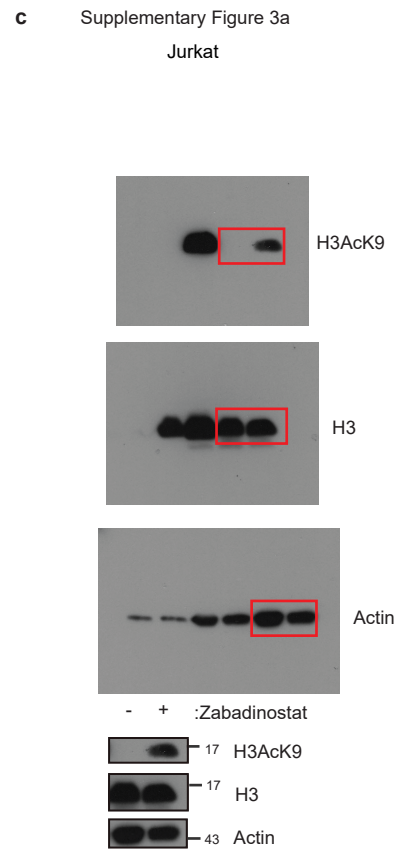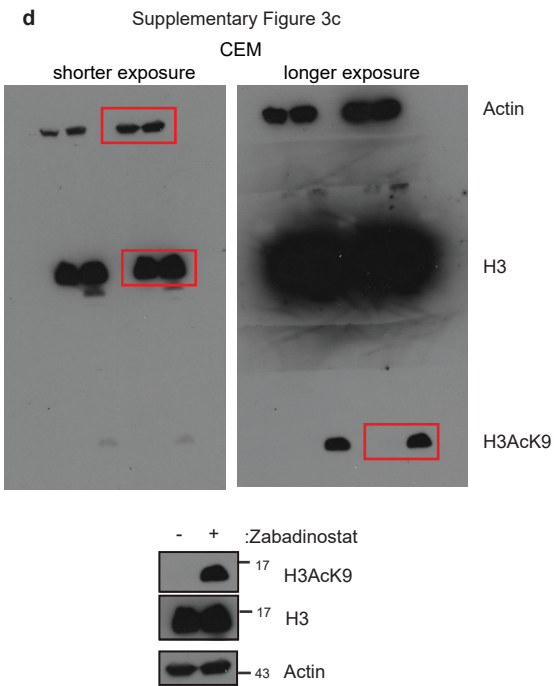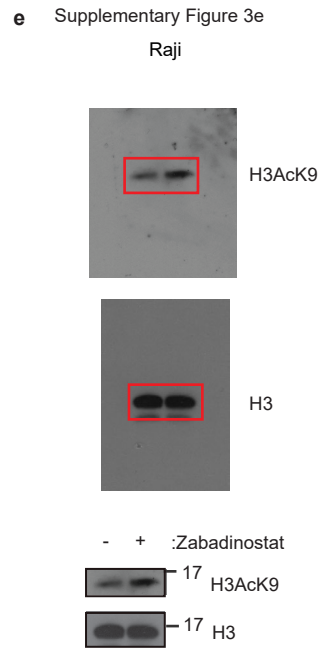



**Supplementary Figure 18. Uncropped versions of immunoblots used in the Figures 1c, 1d, Supplementary Figure 3a, 3c, and 3e.**
